## 32 **Introduction**

33 Since their discovery, embryonic stem cells (ESCs) and their potential in regenerative medicine  
34 have been widely established. They have been programmed to form cone cells for the treatment  
35 of age-related macular degeneration (Zhou et al., 2015), used for the treatment of spinal cord  
36 injury patients (Shroff & Gupta, 2015), differentiated into cardiomyocytes for cardiac tissue  
37 injury repair (Shiba et al., 2012) or into insulin secreting  $\beta$ -cells for treating Type II diabetes  
38 (Bruin et al., 2015; Salguero-Aranda et al., 2016). Their self-renewal characteristics coupled with  
39 their capacity to differentiate into cell types of origin pertaining to all the three germ layers make  
40 them an attractive model system to study queries related to development (Evans & Kaufman,  
41 1981; Martin, 1981). This entails that the molecular pathways and players contributing to the  
42 physiology of stem cells be thoroughly characterized to explore their therapeutic potential to the  
43 fullest.

44

45 Long non-coding RNAs (lncRNAs) have been classified as non-coding RNAs that are >200nt in  
46 length and have been well-established to regulate diverse physiological phenomena from  
47 development to disease. Although they are similar to mRNAs in aspects such as transcription by  
48 RNA Pol II, 5' capping, 3' polyadenylation, splicing and possession of histone modification  
49 signatures of active transcription across their promoters and gene bodies (Guttman et al., 2009),  
50 they differ in other aspects such as low abundance, high tissue-specificity, lower stability and  
51 lesser evolutionary conservation (Ard, Allshire, & Marquardt, 2017; Mercer, Dinger, & Mattick,  
52 2009). Furthermore, they can be localized either in the nucleus or in the cytoplasm to perform  
53 their diverse regulatory functions such as regulation of chromatin architecture (Rinn et al., 2007;  
54 Zhao, Sun, Erwin, Song, & Lee, 2008), genomic imprinting (Pandey et al., 2008; Ripoché, Kress,  
55 Poirier, & Dandolo, 1997; Sleutels, Zwart, & Barlow, 2002), competitive endogenous RNAs  
56 (Cesana et al., 2011; Lu et al., 2016), natural antisense transcripts (Faghihi et al., 2008; Ohhata,  
57 Hoki, Sasaki, & Sado, 2008), Staufen-mediated mRNA decay or modulation of protein activity  
58 (Arun, Akhade, Donakonda, & Rao, 2012; N. Lin et al., 2014; Marchese et al., 2016). lncRNAs  
59 are being increasingly understood in terms of regulation of the nuclear architecture through the  
60 formation of speckles and paraspeckles and tethering of distal chromosomes (Caudron-Herger et  
61 al., 2015; Caudron-Herger & Rippe, 2012; Hacısuleyman et al., 2014; Jacob, Audas, Uniacke,

62 Trinkle-Mulcahy, & Lee, 2013; Shevtsov & Dundr, 2011; Souquere, Beauclair, Harper, Fox, &  
63 Pierron, 2010).

64 In embryonic stem cells (ESCs), genome-wide studies and functional analysis of individual  
65 lncRNAs have shown them to participate in maintaining pluripotency (Bergmann et al., 2015;  
66 Guttman et al., 2011; Sheik Mohamed, Gaughwin, Lim, Robson, & Lipovich, 2010; Z. Sun et al.,  
67 2018; Tu, Tian, Cheung, Wei, & Lee, 2018) as well as in orchestrating differentiation and cell  
68 fate specification programs (Flynn & Chang, 2014; Klattenhoff et al., 2013; Ulitsky,  
69 Shkumatava, Jan, Sive, & Bartel, 2011), in association with transcription factors, chromatin  
70 modifiers and RNA binding proteins. Interestingly, a few of these lncRNAs perform multiple  
71 roles as a function of the cellular contexts and interaction partners. LncRNA Gomafu/Miat/Rncr2  
72 is involved in maintaining pluripotency of mouse ESCs (mESCs) (Sheik Mohamed et al., 2010),  
73 specification of the oligodendrocyte lineage in neural stem cells (Mercer et al., 2010) and  
74 osteogenic lineage differentiation in adipose-derived stem cells (Jin et al., 2017). LncRNA Tuna  
75 has been implicated in maintaining pluripotency of mESCs as well as their differentiation into  
76 the neural lineage through forming a complex with PTBP1, hnRNP-K and NCL that occupies  
77 promoters of *Nanog*, *Sox2* and *Fgf4* (N. Lin et al., 2014). LncRNA Tsx has also been shown to  
78 be involved in the maintenance of mESCs, pachytene spermatocytes in testes and regulation of  
79 cognition and behaviour in mice (Anguera et al., 2011). These examples suggest the diversity  
80 and the context-dependant regulatory functions of lncRNAs in stem cell physiology and demand  
81 further investigations on the roles of lncRNAs in ESCs.

82

83 LncRNA Mrhl (meiotic recombination hotspot locus) was discovered in our laboratory and has  
84 been extensively studied in the context of male germ cell meiotic commitment. It is a 2.4 kb  
85 long, sense, intronic and single-exonic lncRNA, encoded within the 15th intron of the *Phkb* gene  
86 in mouse (Nishant, Ravishankar, & Rao, 2004) and is syntenically conserved in humans (Fatima,  
87 Choudhury, Divya, Bhaduri, & Rao, 2018). It has been shown to act in a negative feedback loop  
88 with WNT signaling in association with its interaction partner p68 to regulate meiotic  
89 progression of type B spermatogonial cells (Akhade, Dighe, Kataruka, & Rao, 2016; Arun et al.,  
90 2012). Genome-wide chromatin occupancy studies have revealed regulation of key genes  
91 involved in spermatogenesis and WNT signaling by Mrhl in a p68 dependant manner, one of  
92 them being the transcription factor SOX8 (Akhade, Arun, Donakonda, & Rao, 2014).

93 Subsequent studies have delineated the mechanisms of WNT mediated down regulation of Mrhl  
94 through the recruitment of the co-repressor CTBP1 at the promoter of Mrhl and regulation of  
95 SOX8 by Mrhl through MYC-MAD-MAX complexes (Kataruka, Akhade, Kayyar, & Rao,  
96 2017), suggesting an intricate network of Mrhl and associated proteins acting to orchestrate the  
97 process of male germ cell meiosis.

98

99 In purview of the aforesaid, we have addressed the role of lncRNA Mrhl in mESCs to understand  
100 it as a molecular player in development and differentiation. We demonstrate through  
101 transcriptome studies that depletion of Mrhl in mESCs leads to dysregulation of 1143 genes with  
102 major perturbation of developmental processes and genes including lineage-specific transcription  
103 factors (TFs) and cell adhesion and receptor activity related genes. mESCs with stable  
104 knockdown of Mrhl displayed aberrance in specification of ectoderm and mesoderm lineages  
105 with no changes in the pluripotency status of the cells, consistent with our transcriptome data.  
106 Genome-wide chromatin occupancy studies showed Mrhl to be associated with ~22,000 loci. To  
107 decipher chromatin-mediated target gene regulation, we overlapped the two datasets and found  
108 key developmental TFs such as RUNX2, POU3F2 and FOXP2 to be directly regulated by Mrhl  
109 possibly through RNA-DNA-DNA triplex formation. Our study delineates lncRNA Mrhl as a  
110 chromatin regulator of cellular differentiation and development genes in mESCs, probably acting  
111 to maintain the cells in a more primed state readily responsive to appropriate differentiation cues.

112

## 113 **Results**

### 114 **Mrhl is a nuclear-localized, chromatin bound moderately stable lncRNA in mESCs**

115 We analyzed poly (A) RNA-Seq datasets from the ENCODE database and observed that Mrhl is  
116 expressed predominantly in the embryonic stages of tissues of various lineages (**Figure 1-**  
117 **supplementary figure 1**). In the brain, heart and lung, Mrhl is expressed all throughout different  
118 stages of embryos whereas its expression is almost nil in the postnatal stages. However, in the  
119 liver and the kidney, Mrhl expression is down regulated but not completely abrogated in the  
120 postnatal stages. From E8.5 onwards, the mouse embryo undergoes a surge of differentiation,  
121 cell specification and organogenesis phenomena. Our data analysis suggested that Mrhl might  
122 have a selective role to play in these processes in the context of mouse embryonic development.  
123 To address this, we used mESCs as our model system of study. RNA FISH revealed Mrhl to be

124 expressed primarily in the nuclei of mESCs (**Figure 1A**). Biochemical fractionation further  
125 validated Mrhl to be present in the nuclear fraction, specifically the chromatin fraction in mESCs  
126 (**Figure 1B, C**). We next addressed if Mrhl was actually associated with the chromatin for which  
127 we performed H3 ChIP followed by qPCR and observed significant enrichment of Mrhl in H3  
128 bound chromatin (**Figure 1D**). To further understand the functional relevance of Mrhl in mESCs,  
129 we performed an assay for RNA half-life and we found Mrhl to display moderate stability with a  
130 half-life of 2.73 hours (**Figure 1E**). Our observations herewith prompted us to investigate further  
131 the functional roles of Mrhl in mESCs.

132

### 133 **Differentiation assay, knockdown and transcriptome analyses reveal Mrhl to regulate** 134 **development and differentiation circuits in mESCs**

135 We next differentiated the mESCs into embryoid bodies and very interestingly observed that  
136 Mrhl was preferentially up regulated at days 4 and 6 of embryoid body formation (**Figure 2A**).  
137 In perspective of the negative feedback regulation between Mrhl and WNT signaling in  
138 spermatogonial progenitors and of WNT signaling contributing to mESC physiology (Atlasi et  
139 al., 2013; Price et al., 2013; Sokol, 2011), we questioned whether Mrhl would function through  
140 similar mechanisms in this context as well. We performed shRNA mediated knockdown of Mrhl  
141 in mESCs and scored for its levels using RNA FISH followed by the status of  $\beta$ -CATENIN  
142 localization by IF. We observed that in cells where Mrhl was depleted with high efficiency,  $\beta$ -  
143 CATENIN was still localized at the membrane indicating non-activation of the WNT pathway  
144 (**Figure 2B**). Furthermore, p68 IP revealed that Mrhl does not interact with p68 in mESCs  
145 (**Figure 2C**). Keeping these observations in mind, we performed transient knockdown of Mrhl in  
146 mESCs using four independent constructs, two of which (referred to as sh. 1 and sh. 4  
147 henceforth) showed us an average down regulation of 50% (**Figure 2D**) and subjected the  
148 scrambled (scr.) and sh.4 treated cells to analysis by RNA-Seq. A quick comparison of the  
149 FPKM values for Mrhl obtained in our analysis versus those reported in the ENCODE database  
150 as well as of scr. versus sh.4 displayed Mrhl to be a low abundant lncRNA and confirmed our  
151 knockdown efficiency respectively (**Figure 2- supplementary figure 2A**). Furthermore, we  
152 observed that the expression of pluripotency factors OCT4 (OCT), SOX2 and NANOG were not  
153 affected upon Mrhl knockdown in mESCs (**Figure 2- supplementary figure 2B**). We obtained a  
154 total of 1143 genes which were dysregulated in expression with 729 being down regulated and

155 414 being up regulated in expression (**Figure 2E**) and we refer to them as the differentially  
156 expressed genes (DEG, **Supplementary File 1**). The DEG majorly belonged to the class of  
157 protein-coding genes and transcription factors with an interesting proportion belonging to  
158 lincRNAs and antisense RNAs as well. Gene ontology (GO) analysis revealed diverse molecular  
159 functions such as binding (23.6%), catalytic activity (18.3%), receptor activity (8.8%) and signal  
160 transducer activity (7.4%) and biological processes such as cellular processes (40.9%), biological  
161 regulation (15.8%), metabolic process (25.7%), developmental process (11.7%) and multicellular  
162 organismal process (10.7%) to be affected (**Figure 2F**). We next performed a GO enrichment  
163 analysis with a  $p$ -value $<0.05$  to understand if one or more of the perturbed processes/pathways  
164 were statistically over represented over the others and we found positive regulation of  
165 developmental processes and positive regulation of multicellular organismal processes to be two  
166 such enriched perturbed processes (**Figure 2G**). Other processes such as protein metabolic  
167 processes, lipid metabolic processes, phosphate metabolic processes, protein modification  
168 processes and MAPK cascade were also amongst the GO enriched list of processes. We then  
169 performed Fisher's exact test in the PANTHER interface with a  $p$ -value $<0.001$  and obtained  
170 several interesting GO categories to be further enriched and represented such as cell-cell  
171 signaling, ion transport, synaptic transmission, response to endogenous stimuli, ectoderm  
172 development, anion transport, cell-cell adhesion and neuromuscular synaptic transmission  
173 (**Supplementary Table 1**). The category of developmental processes (GO:0032502,  
174 **Supplementary File 2**) posed as the most interesting one since it has appeared in both the  
175 enrichment analyses and possessed the maximum number of perturbed genes i.e., 60 with a  
176 significant  $p$ -value of  $6.44E-05$ . We examined the DEG belonging to this category and found that  
177 they belonged to two broad groups of lineage-specific TFs and cell adhesion/receptor activity.  
178 The former group comprised genes encoding factors involved in neuronal lineage, hematopoietic  
179 and vascular lineage, cardiac lineage, skeletal lineage, mesodermal lineage and pancreatic  
180 lineage (**Supplementary Table 2A**) whereas the latter group consisted of genes responsible for  
181 such functions as migration, axon guidance, signaling, growth and differentiation, structural roles  
182 and cellular proliferation amongst others (**Supplementary Table 2B**). From our assays and  
183 analyses herewith, we conclude that Mrhl majorly acts to regulate differentiation and  
184 development related genes and processes in mESCs. Also, we compared the DEG in Mrhl  
185 knockdown conditions in mESCs and GC1-Spg spermatogonial progenitors and made two



186 observations: firstly, the perturbed transcriptome is vastly different, emphasizing the context-  
187 dependent role of Mrhl and secondly, about 25 genes were in common between the two datasets,  
188 suggesting some common target genes of regulation for Mrhl across developmental model  
189 systems (**Figure 2- supplementary figure 2C**).

190

### 191 **Gene co-expression and TF interaction analyses show unique networks to be coordinated** 192 **by Mrhl in mESCs**

193 In order to organize the perturbed transcriptome under conditions of Mrhl knockdown in mESCs  
194 into functional and biologically relevant modules (W. Chen et al., 2018; X. Chen et al., 2016),  
195 we performed hierarchical clustering of the DEG and visualized the resultant clusters or modules  
196 with Cytoscape (**Figure 3A**). We obtained nine such co-expression modules. We then  
197 interrogated each of the modules for functional enrichment with GeneMania tool and observed  
198 diverse functions to be co-regulated by these groups of genes such as ion channel and transporter  
199 activities for clusters 4 and 5, nervous system functions for cluster 6, immune system processes  
200 for cluster 7 and responses to xenobiotic stimuli for cluster 8. Clusters 2 and 3 had varied  
201 functional enrichments whilst clusters 1 and 9 did not show any of such functional  
202 representations. These analyses further support our earlier observations all of which suggest that  
203 in mESCs, Mrhl acts to primarily modulate development and differentiation related processes.

204 We also performed a TF-TF interaction analysis to understand the potential cross-talk between  
205 the dysregulated set of TFs (**Figure 3-Supplementary File 3**) and to identify a master TF  
206 through which Mrhl might be acting to regulate the TF network. TFs have been implicated often  
207 in determining cellular states or fates (Dunn, Martello, Yordanov, Emmott, & Smith, 2014;  
208 Goode et al., 2016). A gene ontology analysis of the perturbed TFs revealed metabolic processes  
209 and developmental processes to be over represented in function (**Figure 3- supplementary**  
210 **figure 3A**). A heat map was generated for delineating the potential TF network by scanning the  
211 promoter sequence of each TF with the motif for each TF (**Fig. 3B**). RUNX2 was obtained as a  
212 potential master TF since it had the maximum number of motifs for binding across the promoters  
213 of all the other TFs followed by ERG (**Figure 3- supplementary figure 3B**). Based on this  
214 logic, a simplified TF hierarchy was established using STRING wherein we observed RUNX2 to  
215 be at the top of the hierarchy with RB1, ERG, FEV, SMAD9 and HEYL being in the first tier  
216 (**Figure 3C**) and undergoing regulation via RUNX2, although their direct regulation by Mrhl

217 cannot be ruled out. Thus, we report a novel TF network or hierarchy operating in mESCs in the  
218 context of Mrhl. Furthermore, since all the TFs are involved in the specification of one of the  
219 three lineages, the observations herewith further emphasize on Mrhl acting to control cell fate  
220 specification and differentiation related circuits in mESCs.

221

### 222 **Stable knockdown of Mrhl in mESCs shows aberrance in lineage specification**

223 Towards understanding the phenotypic implications of Mrhl depletion in mESCs and of our  
224 transcriptome analyses, we generated stable knockdown lines for Mrhl sh.4 and scr. control. Our  
225 initial characterization of the stable knockdown cells showed a knockdown efficiency of 50%  
226 (**Figure 4A**), no change in the pluripotency markers Oct 4, Sox2 and Nanog (**Figure 4B,C** and  
227 **Figure 4-supplementary figure 4A**) as well as no differences in the alkaline phosphatase  
228 expression levels (**Figure 4-supplementary figure 4B**) in the knockdown versus control lines.  
229 Since a couple of cell adhesion genes were present amongst the DEG, we performed IF for E-  
230 CADHERIN and F-ACTIN. A comparison of the staining intensities revealed no significant  
231 changes in cell adhesion properties between knockdown and control mESCs (**Figure 4D** and  
232 **Figure 4-supplementary figure 4C**). These observations corroborate with our transcriptome  
233 data. Next, keeping in mind our earlier conclusions and the observation that Mrhl is up regulated  
234 in expression during embryoid body differentiation, we subjected the knockdown and control  
235 cells to differentiation by the formation of embryoid bodies. Interestingly, we observed that over  
236 days 2 to 8 of differentiation, there was a marked aberrance in the specification of lineages,  
237 specifically the ectoderm and mesoderm lineages (**Figure 4E, F**). For the ectoderm lineage, there  
238 appears to be premature specification in the knockdown cells at day 2 with subsequent loss in  
239 maintenance of the lineage at days 6 and 8. The mesoderm lineage appears to be under-specified  
240 from the beginning of differentiation with some expression of the marker T at day 6 in the  
241 knockdown cells. These observations imply that Mrhl is required in mESCs to undergo proper  
242 specification of early lineages, majorly the ectoderm and mesoderm lineages, although it might  
243 not have a specific role in mESCs per se in the absence of differentiation cues.

244

### 245 **Mrhl regulates target loci in mESCs through chromatin-mediated regulation**

246 In order to further delineate the mechanism by which Mrhl regulates differentiation and  
247 development related genes and processes in mESCs, we performed genome-wide chromatin



248 occupancy studies through ChIRP-Seq since we have demonstrated Mrhl to be a chromatin  
249 bound lncRNA in mESCs. We obtained a total of 21,997 raw peaks and after keeping a cutoff  
250 value of 5-fold enrichment, we obtained 21,282 peaks (**Figure 5A, Supplementary File 4**),  
251 emphasizing the significant and widespread chromatin occupancy of Mrhl in mESCs. The peak  
252 lengths and fold changes appear to be distributed equally across all the chromosomes (**Figure 5-**  
253 **supplementary figure 5A, B**). An annotation of the enriched peaks showed us that diverse  
254 regions including intronic, intergenic and promoter regions of genes as well as repeat elements  
255 undergo physical association with Mrhl (**Figure 5B**). Next, we overlapped the peaks from  
256 ChIRP-Seq and the DEG from RNA-Seq to understand what proportion of the dysregulated  
257 genes upon Mrhl knockdown is regulated by it at the chromatin level. In this regard, we have  
258 used -10 kb upstream of transcription start site (TSS) and +5 kb downstream of TSS of genes as  
259 our domain of target gene regulation by Mrhl which narrowed down the number of peaks to  
260 3412. The overlap analysis revealed 71 genes which are physically occupied and are also  
261 regulated by Mrhl at the chromatin level (**Figure 5C, Supplementary File 5**). We further  
262 examined the 71 genes in detail and found a subset of six genes i.e., RUNX2, SIX2, DLX3,  
263 HOXB7, POU3F2 and FOXP2 to be of noticeable important in terms of being firstly, lineage  
264 determining or development associated transcription factors and secondly, being physically  
265 occupied by Mrhl at the promoter (**Supplementary Table 3A**).

266 A recently established mechanism of chromatin-mediated target gene regulation by lncRNAs is  
267 via the formation of RNA-DNA-DNA triple helical structures (Mondal et al., 2015; Postepska-  
268 Igielska et al., 2015; S. Wang et al., 2018). To delve deeper into the exact mechanism of  
269 chromatin-mediated gene regulation by Mrhl at the promoter of the aforesaid developmental loci,  
270 we hypothesized triplex formation by Mrhl at these loci. For this, we selected a subset of the six  
271 genes i.e., RUNX2, HOXB7, FOXP2 and POU3F2. Their roles in governing the development of  
272 specific lineages such as the osteoblast lineage [RUNX2 (Komori, 2002)], neuronal lineage and  
273 brain development [FOXP2 (Chiu et al., 2014; Tsui, Vessey, Tomita, Kaplan, & Miller, 2013),  
274 POU3F2 (Y. J. Lin et al., 2018; Urban et al., 2015)) or having multiple functions during  
275 development [HOXB7 (Candini et al., 2015; Klein, Benchellal, Kleff, Jakob, & Ergun, 2013)]  
276 have been widely established. We first performed a search for motifs for binding to target  
277 chromatin loci by Mrhl which led to the identification of three distinct motifs with motif 1 being  
278 present in 21.46%, motif 2 being present in 28.16% and motif 3 being present in 43.08% of the

279 total number of peaks. (**Figure 5D and supplementary table 3B**). Next, we analyzed the  
280 promoters of the aforementioned genes corresponding to the region where ChIRP-Seq peaks  
281 were obtained for the presence of one or more of the three motifs by FIMO in MEME suite  
282 followed by potential triplex formation at those sites using the Triplexator program. We observed  
283 the presence of only one motif (motif 3) at the Mrhl occupied region in POU3F2, motifs 1, 2 and  
284 3 in FOXP2 and again motif 3 in RUNX2 and HOXB7. Interestingly, triplex prediction revealed  
285 triplex forming potential at two different sites in POU3F2, one lying within the motif sequence  
286 whereas in FOXP2 and RUNX2, potential triplex forming sites were found immediately adjacent  
287 to the motif sequences. HOXB7, however, did not show propensity for triplex formation within  
288 the Mrhl occupied region (**Figure 5E, Supplementary table 3C, Supplementary File 6**). In lieu  
289 of these observations, we conclude that Mrhl regulates key lineage-specific TFs at the chromatin  
290 possibly through triple helix formation to regulate differentiation of mESCs.

291

## 292 **Discussion**

293 Regulation of pluripotency and/or differentiation phenomena in embryonic stem cells by  
294 lncRNAs in combination with their extensive context-dependent roles poses them as novel  
295 therapeutic targets in the context of regenerative medicine. Linc-RoR mediates the formation of  
296 human induced pluripotent stem cells (Loewer et al., 2010) and contributes to human embryonic  
297 stem cell self-renewal (Y. Wang et al., 2013) whereas lncRNA Cyrano is involved in  
298 maintenance of pluripotency of mESCs (Smith, Starmer, Miller, Sethupathy, & Magnuson,  
299 2017). In parallel, linc-RoR has been implicated in osteogenic differentiation of mesenchymal  
300 stem cells (Feng et al., 2018) whilst Cyrano has been shown to function in conjunction with other  
301 non-coding RNAs to regulate neuronal activity in the mammalian brain (Kleaveland, Shi,  
302 Stefano, & Bartel, 2018) as well as neurodevelopment in zebrafish (Sarangdhar, Chaubey,  
303 Srikakulam, & Pillai, 2018). In our current study, we have characterized and addressed the  
304 functional implications of lncRNA Mrhl, previously shown to regulate male germ cell meiotic  
305 commitment, in mESC circuitry to understand its role in development and differentiation. The  
306 role of nuclear lncRNAs in coordinating and controlling gene expression at a genome-wide level  
307 through a myriad of mechanisms is well known, amongst which regulation of chromatin  
308 architecture/chromatin state at target loci is predominant (Ballarino et al., 2018; Cajigas et al.,  
309 2015; Sun, Hao, & Prasanth, 2018).

310 LncRNA Mrhl depletion majorly dysregulates pathways and processes in mESCs which are  
311 related to lineage-specific development and differentiation and which are largely distinct from  
312 the perturbed gene set in spermatogonial progenitors. This emphasizes the context-dependant  
313 role of Mrhl as a molecular player of the cellular system. This is further supported by lack of  
314 association of Mrhl with p68 or absence of regulation of WNT signaling in mESCs as we have  
315 shown in our studies. In perspective, it would be interesting to address the protein interaction  
316 partners of Mrhl in mESCs, especially to understand in greater depth how Mrhl mediates  
317 regulation at target genes.

318

319 An intriguing point to note is absolutely no perturbation of pluripotency status of mESCs upon  
320 Mrhl knockdown rather disruption of lineage specification in embryoid bodies. These  
321 observations suggest Mrhl to be involved in specifying a primed state of the mESCs wherein  
322 they can undergo balanced specification of lineages upon obtaining differentiation cues. Other  
323 disrupted pathways such as ion transport which have been recurrent in all systems analyses  
324 would be an interesting aspect to address in the future. The aforesaid conclusions are further  
325 supported by the fact that Mrhl is up regulated in expression at days 4 and 6 during embryoid  
326 body differentiation, suggesting it as a regulator of differentiation programs in mESCs and  
327 explaining the aberrance in lineage specification upon differentiation of Mrhl knockdown stable  
328 mESCs. The lack of any effect on the endoderm lineage during in vitro differentiation of the  
329 stable knockdown cells is explainable from an analysis of GO:0032502 wherein in vast majority  
330 only ectoderm and mesoderm related genes were observed to be dysregulated. Furthermore, in  
331 our ENCODE data analysis of organs, Mrhl was observed to be expressed predominantly in  
332 embryonic stages of organs of various lineages such as the brain (ectoderm), kidney, testes  
333 (mesoderm) and lung, liver (endoderm). An interrogation of Mrhl expression in the recently  
334 released Mouse Organogenesis Cell Atlas (Cao et al., 2019) showed Mrhl to be expressed in  
335 progenitor cell types of various tissues. This can only give us an insight about the involvement of  
336 Mrhl not only in the early stages of germ layer specification but in the later stages of  
337 organogenesis as well, although the exact functions in the latter need to be still addressed.

338 The regulation of a novel TF network in mESCs by Mrhl comprising mostly lineage-determining  
339 TFs is an exciting observation. TFs act to govern gene expression programs defining particular  
340 cellular states, more so in association with other TFs in a network (Dore & Crispino, 2011;

341 Niwa, 2018). LncRNAs often integrate into such networks by regulating TFs individually or via  
342 a master TF(s) resulting in downstream regulation of gene expression (Herriges et al., 2014; Yo  
343 & Runger, 2018). The TF network operating in mESCs under the regulation of Mrhl has  
344 RUNX2 at the top of the hierarchy posing it as a master TF in the hierarchy and being potentially  
345 regulated by Mrhl directly through triplex formation at the chromatin level. Amongst the 71  
346 genes overlapping between the DEG and the ChIRP-Seq reads, RUNX2, SIX2 and HOXB7  
347 belong to a common group of the aforesaid set and the TF network. The absence of triplex  
348 formation sites in HOXB7 in spite of the presence of Mrhl binding motifs in its promoter further  
349 strengthens the hypothesis that Mrhl might be regulating the entire network through RUNX2.  
350 Additionally, FOXP2 and POU3F2 although not a part of the TF network, display triplex  
351 forming potential within the Mrhl occupied regions. These observations suggest an interesting  
352 mechanism wherein Mrhl regulates differentiation programs in mESCs through direct regulation  
353 of relevant TFs at their promoters.

354

355 A further analysis of our transcriptome studies herewith shows a significant over representation  
356 of dysregulated genes and processes belonging to neuronal lineage. Ectoderm development was  
357 one of the enriched processes in the Fisher's exact test and ~20% of the dysregulated genes in  
358 GO: 0032502 belonged to neuronal lineage development related functions. In the gene co-  
359 expression analysis, nervous system emerged as one of the perturbed clusters. Furthermore, Mrhl  
360 is predicted to regulate an important neuronal TF such as POU3F2 directly at the chromatin  
361 level. Whilst our phenotype analysis of the stable knockdown cells showed perturbations in early  
362 specification of the ectoderm and mesoderm lineages, further investigations of the role of Mrhl  
363 in specifying more specialized lineages such as the neuronal lineage would be an interesting  
364 aspect of study.

365

366 LncRNAs have been implicated widely for their contributions to embryonic stem cell  
367 differentiation, cell fate specification, organogenesis and development through a diverse array of  
368 mechanisms (Grote & Herrmann, 2015; Perry & Ulitsky, 2016; Sarropoulos, Marin, Cardoso-  
369 Moreira, & Kaessmann, 2019). In our studies we have characterized lncRNA Mrhl and its  
370 functional significance in mESC towards decoding its role in developments. We show Mrhl to  
371 regulate downstream genes and processes involved in differentiation and lineage specification

372 that was reflected in our phenotype studies. A major finding of this study was its potential direct  
373 chromatin mediated regulation of key TFs that mediate differentiation of stem cells into a  
374 specific lineage. Overall, we establish lncRNA Mrhl to be a mediator of differentiation and cell  
375 fate specification events in mESCs.

376

377

378

379

380

381

382

383

384

385

386

387

388

389

390

391

392

393

394

395

396

397

398

399

400

401

402

## 403 **Materials and Methods**

### 404 **Cell lines, antibodies, plasmids and chemicals**

405 E14tg2a feeder independent mESC line was a kind gift from Prof. Tapas K. Kundu's lab  
406 (JNCASR, India). mESCs were maintained on 0.2% gelatin coated dishes in mESC medium  
407 containing DMEM, high glucose, 15% FBS, 1X non-essential amino acids, 0.1 mM  $\beta$ -  
408 mercaptoethanol and 1X penicillin-streptomycin. HEK293T cells (ATCC, U.S.A) were  
409 maintained in DMEM, 10% FBS and 1X penicillin-streptomycin.

410 The antibodies used in this study are as follows: Anti-GAPDH (Abeomics, ABM22C5), anti-H3  
411 (Abcam, ab46765), anti  $\beta$ -CATENIN (Abcam), anti p68 (Novus Biologicals), anti-OCT4  
412 (Abcam, ab27985).

413 Scrambled and Mrhl shRNA plasmids 1, 2, 3 and 4 were custom made from Sigma in the  
414 pLKO.1-Puro-CMV-tGFP vector backbone. The sequences of the shRNAs are as follows:

415 Mrhl shRNA#1: 5'GCACATACATACATACACATATATT 3', Mrhl shRNA#4:  
416 5'GGAGAAACCCTCAAAAGTATT 3'.

417 All fine chemicals were obtained from Sigma (unless otherwise mentioned), gelatin was obtained  
418 from Himedia and FBS was obtained from Gibco (Performance Plus, US Origin).

419

### 420 **Protocols for mESC differentiation, transfection and cell assays**

421 For embryoid body (EB) differentiation, E14tg2a cells were trypsinized using 0.05% trypsin and  
422  $2.5 \times 10^5$  cells were plated onto 35 mm bacteriological grade dishes (Tarsons) in EB  
423 differentiation medium containing DMEM, 10% FBS, 0.1 mM  $\beta$ -mercaptoethanol and 1X  
424 penicillin-streptomycin. EBs were harvested at different time points and processed accordingly  
425 for further analysis.

426 All transfections for E14tg2a cells were performed using Trans IT-X2 reagent (Mirus, MIR  
427 6003) as per the manufacturer's protocol. For transient knockdown analysis, cells were harvested  
428 48 hours post-transfection. Transfections for HEK293T cells were performed using  
429 Lipofectamine 2000 (Thermo Fisher Scientific) as per the manufacturer's protocol.

430 For measurement of half-life of Mrhl, E14tg2a cells, at a confluency of ~80-90%, were treated  
431 with 10  $\mu$ M actinomycin D (Sigma, A9415). Cells were harvested at different time points for  
432 further analysis.

433 Alkaline phosphatase assay was performed as per the manufacturer's protocol (Sigma, 86R).



434 **Generation of stable knockdown lines**

435 Stable mESC knockdown lines for Mrhl were generated in E14tg2a cells as per the protocol of  
436 Pijnappel *et al* (Pijnappel, P.A. Baltissen, & Timmers, 2013) with some modifications Briefly,  
437 viral particles were generated in HEK293T cells by transfection of 5 µg scrambled or Mrhl  
438 shRNA plasmids, 2.5 µg pSPAX2, 1.75 µg pVSVG and 0.75µg pRev. The media containing  
439 viral particles was harvested 48 hours after transfection and centrifuged at 4,000 rpm for 5  
440 minutes to remove cellular debris. Fresh mESC medium was added and harvested after an  
441 additional 24 hours to collect second round of viral particles. The viral supernatants were stored  
442 in -80°C if necessary. E14tg2a cells were plated such that they reached a confluency of ~60-70%  
443 on the day of transduction. The viral supernatant was mixed with 8 µg/ml DEAE-dextran and  
444 1000 units/ml ESGRO (Merck Millipore) and added directly to the E14tg2a cells. Transduction  
445 was performed for 24 hours with the first round of viral particles and an additional 24 hours with  
446 the second round of viral particles. The transduced cells were then subjected to puromycin  
447 selection (1.5 µg/ml puromycin) for a week.

448

449 **RNA fluorescent in situ hybridization (FISH) and immunofluorescence (IF)**

450 RNA FISH followed by IF was performed as per the protocol of de Planell-Saguer *et al* (de  
451 Planell-Saguer, Rodicio, & Mourelatos, 2010) with modifications. The probes used for RNA  
452 FISH studies were Cy5 labelled locked nucleic acid probes procured from Exiqon (reported in  
453 (Arun *et al.*, 2012)). Briefly, cells were grown on gelatin coated coverslips. EBs were fixed in  
454 4% paraformaldehyde for 7-8 hours at 4°C followed by equilibration in 20% sucrose solution  
455 overnight and embedded in tissue freezing medium (Leica). The embedded tissues were then  
456 cryo-sectioned and collected on Superfrost slides (Fisher Scientific). For cells, a brief wash was  
457 given with 1X PBS (phosphate buffered saline, pH 7.4) followed by fixation with 2%  
458 formaldehyde for 10 minutes at room temperature. The cells were then washed with 1X PBS  
459 three times for 1 minute each and permeabilization buffer (1X PBS, 0.5% Triton X-100) was  
460 added for 5 minutes and incubated at 4°C. The permeabilization buffer was removed and cells  
461 were washed briefly with 1X PBS for three times at room temperature. For tissue sections,  
462 antigen retrieval was performed by boiling the sections in 0.01M citrate buffer (ph 6) for 10  
463 minutes. The sections were allowed to cool, washed in distilled water three times for 5 minutes  
464 each and then in 1X PBS for 5 minutes, each time with gentle shaking.

465 For FISH, samples were blocked in prehybridization buffer [3% BSA, 4X SSC (saline sodium  
466 citrate, pH 7)] for 40 minutes at 50°C. Hybridization (Mrhl probes tagged with Cy5, final  
467 concentration 95nM) was performed with prewarmed hybridization buffer (10% dextran sulphate  
468 in 4X SSC) for 1 hour at 50°C. After hybridization, slides were washed four times for 6 minutes  
469 each with wash buffer I (4X SSC, 0.1% Tween-20) at 50°C followed by two washes with wash  
470 buffer II (2X SSC) for 6 minutes each at 50°C. The samples were then washed with wash buffer  
471 III (1X SSC) once for 5 minutes at 50°C followed by one wash with 1X PBS at room  
472 temperature. For tissue sections, all washes were performed as mentioned above with a time of 4  
473 minutes for buffers I-III.

474 For IF, samples were blocked with IF blocking buffer (4% BSA, 1X PBS) for 1 hour at 4°C.  
475 Primary antibody solution (2% BSA, 1X PBS) was prepared containing the appropriate dilution  
476 of desired primary antibody and the samples were incubated in it for 12 hours at 4°C. Next day,  
477 the samples were washed with IF wash buffer (0.2% BSA, 1X PBS) three times for 5 minutes  
478 each with gentle shaking. The samples were incubated in secondary antibody for 45 minutes at  
479 room temperature and washed with 1X PBS three times for 10 minutes each with gentle shaking.  
480 The samples were finally mounted in mounting medium containing glycerol and DAPI.

481

## 482 **Biochemical fractionation**

### 483 **Cell fractionation**

484 Approximately 5-10 million cells were lysed using lysis buffer (0.8 M sucrose, 150 mM KCl, 5  
485 mM MgCl<sub>2</sub>, 6 mM β-mercaptoethanol and 0.5% NP-40) supplemented with 75 units/ml RNase  
486 inhibitor (Thermo Fisher Scientific) and 1X mammalian protease inhibitor cocktail (Roche)  
487 and centrifuged at 10,000 g for 5 minutes at 4 °C. The supernatant containing cytoplasmic  
488 fraction was mixed with 3 volumes of TRIzol for RNA extraction or with Laemmli buffer for  
489 western blotting as described later. The resultant pellet was washed twice with lysis buffer and  
490 was subjected to RNA or protein extraction.

### 491 **Sub-nuclear fractionation**

492 Approximately 10 million cells were lysed with hypotonic lysis buffer (10 mM Tris-HCl ph 7.5,  
493 10 mM NaCl, 3 mM MgCl<sub>2</sub>, 0.3% v/v NP-40 and 10% v/v/ glycerol) supplemented with RNase  
494 inhibitor and mammalian protease inhibitor cocktail and centrifuged at 1,000 g for 5 minutes at 4  
495 °C. The supernatant comprising the cytoplasmic fraction was kept aside and the nuclear pellet

496 was washed twice with hypotonic lysis buffer. The nuclear pellet was then resuspended in  
497 modified Wuarin-Schibler buffer (10 mM Tris-HCl pH 7.0, 4 mM EDTA, 300 mM NaCl, 1 M  
498 urea and 1% NP-40) supplemented with RNase inhibitor and mammalian protease inhibitor  
499 cocktail and vortexed for 10 minutes. Nucleoplasmic and chromatin fractions were separated by  
500 centrifugation at 1,000 g for 5 minutes at 4 °C. The chromatin pellet was resuspended in  
501 sonication buffer (20 mM Tris-HCl pH 7.5, 150 mM NaCl, 3 mM MgCl<sub>2</sub>, 0.5 mM PMSF, 75  
502 units/ml RNase inhibitor) and sonicated for 10 minutes. The chromatin was then obtained as the  
503 supernatant following centrifugation at 18,000 g for 10 minutes at 4 °C to remove all debris. The  
504 resultant nucleoplasmic and chromatin fractions were then subjected to RNA or protein  
505 extraction as described later.

506

### 507 **Immunoprecipitation (IP)**

#### 508 **p68 IP**

509 Cells were lysed in hypotonic lysis buffer (10 mM Tris-HCl pH 7.5, 10 mM NaCl, 3 mM MgCl<sub>2</sub>,  
510 0.3% NP-40, 10% glycerol) supplemented with RNase inhibitor, mammalian protease inhibitor  
511 cocktail and 1mM PMSF. Nuclei were pelleted down at 1200 g for 10 minutes at 4°C and  
512 subsequently lysed in nuclear lysis buffer (150 mM KCl, 25 mM Tris pH 7.4, 5 mM EDTA,  
513 0.5% NP-40) supplemented with RNase inhibitor, mammalian protease inhibitor cocktail and  
514 PMSF. The debris was removed by centrifugation at 15,000 g for 10 minutes at 4°C and the  
515 supernatant nuclear fraction was collected. To 1 mg of the nuclear fraction containing proteins, 7  
516 µg of either pre-immune serum or p68 antibody was added and incubated overnight at 4°C. Next  
517 day, the fraction was incubated with protein A dynabeads for 3 hours at 4°C. The beads were  
518 washed with wash buffer (20 mM Tris-HCl pH 7.4, 2 mM MgCl<sub>2</sub>, 10 mM KCL, 150 mM NaCl,  
519 10% glycerol, 0.2% NP-40) supplemented with RNase inhibitor, mammalian protease inhibitor  
520 cocktail and PMSF. Subsequently, the beads were washed twice with wash buffer (as above with  
521 0.5% NP-40) and collected. The beads were then resuspended either in RNAiso Plus and  
522 subjected to RNA isolation for qRT-PCR analysis or in Laemmli buffer and resolved on a 10%  
523 SDS-PAGE gel for western blotting analysis as described later.

#### 524 **Chromatin IP**

525 Chromatin IP (ChIP) was performed as per Cotney and Noonan's protocol (Cotney & Noonan,  
526 2015). Approximately 6-7 million cells were cross-linked with 1% formaldehyde for 10 minutes.

527 The reaction was quenched with 125mM glycine for 5 minutes and washed twice with ice-cold  
528 1X PBS. Cells were lysed using hypotonic lysis buffer (10mM Tris pH 7.5, 10mM NaCl, 3mM  
529 MgCl<sub>2</sub>, 0.3% NP-40 and 10% glycerol) supplemented with RNase inhibitor and mammalian  
530 protease inhibitor cocktail. Nuclei were pelleted at 1200g for 10 minutes at 4°C and resuspended  
531 in nuclear lysis buffer (0.1% SDS, 0.5% Triton X-100, 20mM Tris pH 7.5 and 150mM NaCl)  
532 RNase inhibitor and mammalian protease inhibitor cocktail. Resuspended nuclei were then  
533 sonicated (Biorupter, 25 cycles) and ~15 ug chromatin was incubated with either 4µg H3  
534 antibody or pre-immune serum overnight at 4°C. Antibody bound chromatin was then pulled  
535 down using protein A dynabeads (Thermo Fischer Scientific) for 3 hours at 4°C. The beads were  
536 then washed sequentially with wash buffer I (nuclear lysis buffer), wash buffer II (nuclear lysis  
537 buffer with 500mM NaCl) and wash buffer III (10mM Tris pH 8.0, 0.5% NP-40, 0.5% sodium  
538 deoxycholate, 1mM EDTA), each supplemented with RNase inhibitor and mammalian protease  
539 inhibitor cocktail for 5 minutes each. The beads were then either processed directly for western  
540 blotting or subjected to elution for 1 hour at 55°C in elution buffer (100mM NaCl, 10mM Tris  
541 pH 7.5, 1mM EDTA, 0.5% SDS) supplemented with 100ug/ml proteinase K. The supernatant  
542 was then subjected to reverse cross-linking by heating for 10 minutes at 95°C and then taken  
543 forward for RNA isolation using TriZol (Ambion).

544

#### 545 **Chromatin Isolation by RNA Purification (ChIRP)**

546 ChIRP was carried out according to the protocol of Chu *et al* (Chu, Quinn, & Chang, 2012).  
547 Anti-sense (As) DNA probes with BiotinTEG at 3' end was designed using the online probe  
548 designer at single-molecule FISH online designer. As-DNA probes were designed for both  
549 LncRNA Mrhl and LacZ for selective retrieval of RNA target by ChIRP. Cells were grown to  
550 confluency and ~80 million cells were harvested to perform ChIRP. Cells were cross linked with  
551 1% glutaraldehyde to preserve RNA-Chromatin interactions and cell pellet was prepared.  
552 Crosslinked cells were lysed to prepare cell lysate using freshly prepared lysis buffer (50 mM  
553 Tris-Cl pH 7.0, 10 mM EDTA, 1 % SDS) supplemented with 1mM PMSF, 1X mammalian  
554 protease inhibitor cocktail (PI) and superase-in. The suspension was divided into 400 µl aliquots  
555 and subjected immediately to sonication. Sonication was continued until the cell lysate was no  
556 longer turbid. When lysate turned clear, 5 µl lysate was transferred to a fresh eppendorf tube. 90  
557 µl DNA Proteinase K (PK) buffer (100 mM NaCl, 10 mM Tris-Cl pH 7.0, 1 mM EDTA, 0.5 %

558 SDS) supplemented with 5  $\mu$ l PK was added and incubated for 45 min at 55°C. DNA was  
559 extracted with Diagenode microChIP DiaPure purification kit to check DNA size on 1% agarose  
560 gel. If bulk of the DNA smear was 100-500 bp, sonication was assumed completed. Subsequent  
561 morning biotinylated DNA probes were hybridized to RNA and bound chromatin was isolated.  
562 For a typical ChIRP sample using 1 ml of lysate, 5% was kept aside for RNA input and DNA  
563 input. Hybridization buffer (750 mM NaCl, 1 % SDS, 50 mM Tris-Cl pH 7.0, 1 mM EDTA, 15  
564 % formamide) supplemented with 1mM PMSF, 1X PI and superase-in was added to each lysate  
565 tube. 100 pmol of probe mix was added per 1 ml chromatin (1  $\mu$ l of 100 pmol/ $\mu$ l probe per 1 ml  
566 chromatin). This was incubated for 4 hrs at 37 °C with shaking. 100  $\mu$ l C-1 magnetic beads were  
567 used per 100 pmol of probes. Beads were resuspended in original volume of lysis buffer  
568 supplemented with PMSF, PI and superase-in. After 4 hr hybridization reaction was completed,  
569 60  $\mu$ l beads were added to each tube and incubated at 37 °C for 30 min with shaking. The beads  
570 were then washed for five times with wash buffer (2 $\times$  SSC, 0.5 % SDS, 1 mM PMSF). At last  
571 wash, the beads were resuspended well. 100  $\mu$ l was set aside for RNA isolation and 900  $\mu$ l for  
572 DNA isolation. All tubes were placed on DynaMag-2 magnetic strip and last traces of wash  
573 buffer removed. RNA was isolated for further qRT-PCR analysis. LacZ was used as a negative  
574 control. DNA was isolated and sent for high throughput sequencing in duplicates.

575

### 576 **RNA isolation and PCR**

577 Total RNA was isolated from cells or tissues using TRIzol (Thermo Fisher Scientific) for RNA-  
578 sequencing and IP or using RNAiso Plus (Takara Bio) for analysis by qRT-PCR as per the  
579 manufacturer's protocol. All RNA samples were subjected to DNase treatment (NEB) and about  
580 1-3.5  $\mu$ g of the RNA was taken for cDNA synthesis using oligodT primers (Thermo Fisher  
581 Scientific), RevertAid reverse transcriptase (Thermo Fisher Scientific) and RNase inhibitor  
582 (Takara Bio). The cDNA was diluted 1:1 with nuclease free water and subjected to qRT-PCR  
583 using SyBr green mix (Takara) in real-time PCR machine (BioRad CFX96). All semi-  
584 quantitative PCR was performed in thermal cycler machine (BioRad, Tetrad2) using Taq  
585 polymerase (Takara).

586

587

588

589 **Systems analysis**

590 **RNA-Seq analysis**

591 E14tg2a cells treated with scrambled or Mrhl shRNA (shRNA 4) were subjected to RNA  
592 isolation and quality check. RNA samples were then subjected to library preparation in  
593 duplicates and sequenced on Illumina Hi-Seq 2500 platform. mm10 Genome was downloaded  
594 from GENCODE and indexed using Bowtie2-build with default parameters. Adapter ligation  
595 was done using Trim Galore (v 0.4.4) and each of the raw Fastq files were passed through a  
596 quality check using the FastQC. PCR duplicates were removed using the Samtools 1.3.1 with the  
597 help of 'rmdup' option. Each of the raw files were then aligned to mm10 genome assembly using  
598 TopHat with default parameters for paired-end sequencing as described in (Trapnell et al., 2012).  
599 After aligning, quantification of transcripts was performed using Cufflinks and then Cuffmerge  
600 was used to create merged transcriptome annotation. Finally differentially expressed genes were  
601 identified using Cuffdiff. The threshold for DE genes was  $\log_2$  (fold change)  $>1.5$  for up  
602 regulated genes and  $\log_2$  (fold change)  $<1.5$  for down regulated genes. The DE genes were  
603 analyzed further using R CummeRbund package.

604 **GO enrichment analysis**

605 Gene Ontology (GO) analysis was performed in PANTHER (Thomas et al., 2003). Significant  
606 enrichment test was performed with the set of differentially expressed genes in PANTHER and  
607 Bonferroni correction method was applied to get the best result of significantly enriched  
608 biological processes.

609 **Fisher's exact test**

610 Fisher's exact test was performed in PANTHER Gene Ontology (GO) where p-value significance  
611 was calculated based on the ratio of obtained number of genes to the expected number of genes  
612 (O/E) considering the total number of genes for the respective pathway in *Mus musculus*.

613 **Cluster analysis**

614 Hierarchical clustering method was performed using Cluster 3.0 (de Hoon, Imoto, Nolan, &  
615 Miyano, 2004). Gene expression data (FPKM of all samples i.e, scrambled and shRNA treated)  
616 was taken and  $\log_2$  transformed. Low expressed (FPKM $<0.05$ ) and invariant genes were  
617 removed. Then genes were centered and clustering was performed based on differential  
618 expression pattern of genes and fold change. Genes were grouped in 9 clusters and visualized as



619 a network in Cytoscape (Shannon et al., 2003). Functional enrichment of each cluster was  
620 performed using the Gene Mania Tool (Warde-Farley et al., 2010).

### 621 **TF network analysis**

622 Motifs were downloaded for all transcription factors from JASPAR (Mathelier et al., 2014) and  
623 sequence of interest for each TF (1.5 kb upstream & 500bp downstream of TSS) was extracted  
624 using BedtoFasta of the Bedtools suite (Quinlan & Hall, 2010) . Then each motif was scanned  
625 across the sequence of all TFs to create the table matrix that reflects the number of binding sites  
626 for each TF across the other TFs using MEME suite (Bailey et al., 2009) with a e-value of 1E-04.  
627 Finally the heatmap was generated from the table matrix using R 3.3.2. TFs were fed into  
628 STRING (Jensen et al., 2009) to visualize the known interactions from the experimental data and  
629 hierarchy was setup manually as per the interaction among given TFs (proteins).

### 630 **ChIRP-Seq analysis**

631 mm10 Genome was downloaded from GENCODE and indexed using Bowtie2-build with default  
632 parameters. Adapter ligation was done using Trim Galore (v 0.4.4) and each of the raw Fastq  
633 files were passed through a quality check using the FastQC. PCR duplicates were removed using  
634 the Samtools 1.3.1 with the help of 'rmdup' option. Each of the raw files was then aligned  
635 to mm10 genome assembly using Bowtie 2 with default parameters for paired-end sequencing as  
636 described in. Replicates of both control and treated were merged respectively. Peaks were called  
637 using MACS2. Final peaks were selected giving the criteria of above 5-fold change and p value  
638 < 0.05.

### 639 **Mrhl Motif Prediction**

640 Motifs were identified using MEME, using the criteria of One Occurrence Per Sequence (OOPS)  
641 and significance of 1E-04 for 21282 genomic loci. Sequence for each locus was extracted from  
642 mm10 genome using bedtofasta of bedtools suite. After feeding sequences from 21282 genomic  
643 loci obtained from MACS2, 3 significant motifs were identified.

### 644 **Triplex Prediction**

645 Sequence from the Mrhl occupied region (in addition extended upto +/- 25 bp) of selected genes  
646 was used for Triplex prediction using the software Triplexator (Buske, Bauer, Mattick, & Bailey,  
647 2012) with default parameters.

648

649

650 **qRT-PCR primer sequences**

| Gene Name             | Forward Primer (5' to 3') | Reverse Primer (5' to 3') |
|-----------------------|---------------------------|---------------------------|
| Oct4                  | ACCACCATCTGTCGCTTC        | CCACATCCTTCTCTAGCC        |
| Sox2                  | GAGTGGAAACTTTTGTCCGAGA    | GAAGCGTGTACTTATCCTTCTTCAT |
| Nanog                 | AGGGTCTGCTACTGAGATGCTCTG  | CAACCACTGGTTTTTCTGCCACCG  |
| Fgf5                  | GTAGCGCGACGTTTTCTTCG      | AATTTGGCTTAACACACTGGC     |
| Gata3                 | GGCTACGGTGCAGAGGTATC      | GATGGACGTCTTGGAGAAGG      |
| T                     | CAGCCACCTACTGGCTCTA       | CCCCTTCATACATCGGAGAA      |
| $\beta$ -globin       | CTCAAGGAGACCTTTGCTCA      | AGTCCCCATGGAGTCAAAGA      |
| $\alpha$ -fetoprotein | CCTGTGAACTCTGGTATCAG      | GCTCACACCAAAGCGTCAAC      |
| Mrhl                  | TGAGGACCATGGCTGGACTCT     | AGATGCAGTTTCCAATGTCCAAAT  |
| $\beta$ -actin        | AGGTCATCACTATTGGCAACG     | TACTCCTGCTTGCTGATCCAC     |
| GAPDH                 | GGGAAATGAGAGAGGCCAG       | TACGGCCAAATCCGTTTACA      |
| U1snRNA               | CTTACCTGGCAGGGGAGAT       | CAGTCCCCCACTACCACAA       |
| SRA                   | TCCACCTCCTTCAAGTAAGC      | GACCTCAGTCACATGGTCAACC    |

651

652 **Oligo Sequences for ChIRP-Seq**

653 Mrhl Oligo 1: 5'- AGTCAGATTACTGCTGGTCAGAACTAATAAACTCA-3'

654 Mrhl Oligo 2: 5'- CTGCTTCCTTCCTGGAATCAACAATAAAGCAGTTA-3'

655 Mrhl Oligo 3: 5'-ACTTCTTTCCAGTGACTGCAATTATCTTACAGAAGA-3'

656 Mrhl Oligo 4: 5'-TGAGTTTATTAGTTCTGACCAAGCAGTAATCTGACT-3'

657 Mrhl Oligo 5: 5'-TAACTGCTTTATTGTTGATTCCAGGAAGGAAGCAG-3'

658 Mrhl Oligo 6: 5'-TCTTCTGTAAGATAATTGCAGTCACTGGAAAGAAGT-3'

659

660 LacZ1: 5'- CCAGTGAATCCGTAATCATG-3'

661 LacZ2: 5'- TCACGACGTTGTAAAACGAC-3'

662

663

664

665

666 **Competing Interests:**

667 The authors declare that they have no competing interests.

668

669 **Acknowledgements:**

670 We thank Prof. Tapas Kumar Kundu (JNCASR, India) for providing E14TG2a mESCs and Prof.  
671 Maneesha Inamdar (JNCASR, India) for intellectual discussions. We thank Suma B.S of the  
672 Confocal Imaging Facility, Dr. R.G Prakash of the Animal Facility and Anitha G. of the  
673 Sequencing Facility at JNCASR, India. We thank Dhanur P. Iyer for initial help in  
674 standardization of RNA FISH technique. M.R.S Rao acknowledges Department of Science and  
675 Technology, Govt. of India for SERB Distinguished Fellowship and this work was financially  
676 supported by Department of Biotechnology, Govt. of India (Grant Numbers: BT/01/COE/07/09  
677 and DBT/INF/22/SP27679/2018). Debosree Pal thanks University Grants Commission and  
678 JNCASR, India for her PhD fellowship.

679

680

681 **References:**

682

- 683 1. Akhade, V. S., Arun, G., Donakonda, S., & Rao, M. R. (2014). Genome wide chromatin  
684 occupancy of mrhl RNA and its role in gene regulation in mouse spermatogonial cells.  
685 *RNA Biol*, 11(10), 1262-1279. doi:10.1080/15476286.2014.996070
- 686 2. Akhade, V. S., Dighe, S. N., Kataruka, S., & Rao, M. R. (2016). Mechanism of Wnt  
687 signaling induced down regulation of mrhl long non-coding RNA in mouse  
688 spermatogonial cells. *Nucleic Acids Res*, 44(1), 387-401. doi:10.1093/nar/gkv1023
- 689 3. Anguera, M. C., Ma, W., Clift, D., Namekawa, S., Kelleher, R. J., 3rd, & Lee, J. T.  
690 (2011). Tsx produces a long noncoding RNA and has general functions in the germline,  
691 stem cells, and brain. *PLoS Genet*, 7(9), e1002248. doi:10.1371/journal.pgen.1002248
- 692 4. Ard, R., Allshire, R. C., & Marquardt, S. (2017). Emerging Properties and Functional  
693 Consequences of Noncoding Transcription. *Genetics*, 207(2), 357-367.  
694 doi:10.1534/genetics.117.300095
- 695 5. Arun, G., Akhade, V. S., Donakonda, S., & Rao, M. R. (2012). mrhl RNA, a long  
696 noncoding RNA, negatively regulates Wnt signaling through its protein partner Ddx5/p68  
697 in mouse spermatogonial cells. *Mol Cell Biol*, 32(15), 3140-3152.  
698 doi:10.1128/mcb.00006-12
- 699 6. Atlasi, Y., Noori, R., Gaspar, C., Franken, P., Sacchetti, A., Rafati, H., . . . Fodde, R.  
700 (2013). Wnt signaling regulates the lineage differentiation potential of mouse embryonic  
701 stem cells through Tcf3 down-regulation. *PLoS Genet*, 9(5), e1003424.  
702 doi:10.1371/journal.pgen.1003424

- 703 7. Bailey, T. L., Boden, M., Buske, F. A., Frith, M., Grant, C. E., Clementi, L., . . . Noble,  
704 W. S. (2009). MEME SUITE: tools for motif discovery and searching. *Nucleic Acids Res*,  
705 37(Web Server issue), W202-208. doi:10.1093/nar/gkp335
- 706 8. Ballarino, M., Cipriano, A., Tita, R., Santini, T., Desideri, F., Morlando, M., . . . Bozzoni,  
707 I. (2018). Deficiency in the nuclear long noncoding RNA Charme causes myogenic  
708 defects and heart remodeling in mice. *Embo j*, 37(18). doi:10.15252/embj.201899697
- 709 9. Bergmann, J. H., Li, J., Eckersley-Maslin, M. A., Rigo, F., Freier, S. M., & Spector, D. L.  
710 (2015). Regulation of the ESC transcriptome by nuclear long noncoding RNAs. *Genome*  
711 *Res*, 25(9), 1336-1346. doi:10.1101/gr.189027.114
- 712 10. Bruin, J. E., Saber, N., Braun, N., Fox, J. K., Mojibian, M., Asadi, A., . . . Kieffer, T. J.  
713 (2015). Treating diet-induced diabetes and obesity with human embryonic stem cell-  
714 derived pancreatic progenitor cells and antidiabetic drugs. *Stem Cell Reports*, 4(4), 605-  
715 620. doi:10.1016/j.stemcr.2015.02.011
- 716 11. Buske, F. A., Bauer, D. C., Mattick, J. S., & Bailey, T. L. (2012). Triplexator: detecting  
717 nucleic acid triple helices in genomic and transcriptomic data. *Genome Res*, 22(7), 1372-  
718 1381. doi:10.1101/gr.130237.111
- 719 12. Cajigas, I., Leib, D. E., Cochrane, J., Luo, H., Swyter, K. R., Chen, S., . . . Kohtz, J. D.  
720 (2015). Evf2 lncRNA/BRG1/DLX1 interactions reveal RNA-dependent inhibition of  
721 chromatin remodeling. *Development*, 142(15), 2641-2652. doi:10.1242/dev.126318
- 722 13. Candini, O., Spano, C., Murgia, A., Grisendi, G., Veronesi, E., Piccinno, M. S., . . .  
723 Dominici, M. (2015). Mesenchymal progenitors aging highlights a miR-196 switch  
724 targeting HOXB7 as master regulator of proliferation and osteogenesis. *Stem Cells*, 33(3),  
725 939-950. doi:10.1002/stem.1897
- 726 14. Cao, J., Spielmann, M., Qiu, X., Huang, X., Ibrahim, D. M., Hill, A. J., . . . Shendure, J.  
727 (2019). The single-cell transcriptional landscape of mammalian organogenesis. *Nature*,  
728 566(7745), 496-502. doi:10.1038/s41586-019-0969-x
- 729 15. Caudron-Herger, M., Pankert, T., Seiler, J., Nemeth, A., Voit, R., Grummt, I., & Rippe,  
730 K. (2015). Alu element-containing RNAs maintain nucleolar structure and function.  
731 *Embo j*, 34(22), 2758-2774. doi:10.15252/embj.201591458
- 732 16. Caudron-Herger, M., & Rippe, K. (2012). Nuclear architecture by RNA. *Curr Opin*  
733 *Genet Dev*, 22(2), 179-187. doi:10.1016/j.gde.2011.12.005
- 734 17. Cesana, M., Cacchiarelli, D., Legnini, I., Santini, T., Sthandier, O., Chinappi, M., . . .  
735 Bozzoni, I. (2011). A long noncoding RNA controls muscle differentiation by  
736 functioning as a competing endogenous RNA. *Cell*, 147(2), 358-369.  
737 doi:10.1016/j.cell.2011.09.028
- 738 18. Chen, W., Zhang, X., Li, J., Huang, S., Xiang, S., Hu, X., & Liu, C. (2018).  
739 Comprehensive analysis of coding-lncRNA gene co-expression network uncovers  
740 conserved functional lncRNAs in zebrafish. *BMC Genomics*, 19(Suppl 2), 112.  
741 doi:10.1186/s12864-018-4458-7
- 742 19. Chen, X., Liu, B., Yang, R., Guo, Y., Li, F., Wang, L., & Hu, H. (2016). Integrated  
743 analysis of long non-coding RNAs in human colorectal cancer. *Oncotarget*, 7(17), 23897-  
744 23908. doi:10.18632/oncotarget.8192
- 745 20. Chiu, Y. C., Li, M. Y., Liu, Y. H., Ding, J. Y., Yu, J. Y., & Wang, T. W. (2014). Foxp2  
746 regulates neuronal differentiation and neuronal subtype specification. *Dev Neurobiol*,  
747 74(7), 723-738. doi:10.1002/dneu.22166

- 748 **21.** Chu, C., Quinn, J., & Chang, H. Y. (2012). Chromatin isolation by RNA purification  
749 (ChIRP). *J Vis Exp*(61). doi:10.3791/3912
- 750 **22.** Cotney, J. L., & Noonan, J. P. (2015). Chromatin immunoprecipitation with fixed animal  
751 tissues and preparation for high-throughput sequencing. *Cold Spring Harb Protoc*,  
752 *2015*(2), 191-199. doi:10.1101/pdb.prot084848
- 753 **23.** de Hoon, M. J., Imoto, S., Nolan, J., & Miyano, S. (2004). Open source clustering  
754 software. *Bioinformatics*, *20*(9), 1453-1454. doi:10.1093/bioinformatics/bth078
- 755 **24.** de Planell-Saguer, M., Rodicio, M. C., & Mourelatos, Z. (2010). Rapid in situ  
756 codetection of noncoding RNAs and proteins in cells and formalin-fixed paraffin-  
757 embedded tissue sections without protease treatment. *Nat Protoc*, *5*(6), 1061-1073.  
758 doi:10.1038/nprot.2010.62
- 759 **25.** Dore, L. C., & Crispino, J. D. (2011). Transcription factor networks in erythroid cell and  
760 megakaryocyte development. *Blood*, *118*(2), 231-239. doi:10.1182/blood-2011-04-  
761 285981
- 762 **26.** Dunn, S. J., Martello, G., Yordanov, B., Emmott, S., & Smith, A. G. (2014). Defining an  
763 essential transcription factor program for naive pluripotency. *Science*, *344*(6188), 1156-  
764 1160. doi:10.1126/science.1248882
- 765 **27.** Evans, M. J., & Kaufman, M. H. (1981). Establishment in culture of pluripotential cells  
766 from mouse embryos. *Nature*, *292*(5819), 154-156. doi:10.1038/292154a0
- 767 **28.** Faghihi, M. A., Modarresi, F., Khalil, A. M., Wood, D. E., Sahagan, B. G., Morgan, T.  
768 E., . . . Wahlestedt, C. (2008). Expression of a noncoding RNA is elevated in Alzheimer's  
769 disease and drives rapid feed-forward regulation of beta-secretase. *Nat Med*, *14*(7), 723-  
770 730. doi:10.1038/nm1784
- 771 **29.** Fatima, R., Choudhury, S. R., Divya, T. R., Bhaduri, U., & Rao, M. R. S. (2018). A novel  
772 enhancer RNA, Hmrhl, positively regulates its host gene, <em>phkb,</em>in Chronic  
773 Myelogenous Leukemia. *bioRxiv*, 378984. doi:10.1101/378984
- 774 **30.** Feng, L., Shi, L., Lu, Y. F., Wang, B., Tang, T., Fu, W. M., . . . Zhang, J. F. (2018). Linc-  
775 ROR Promotes Osteogenic Differentiation of Mesenchymal Stem Cells by Functioning as  
776 a Competing Endogenous RNA for miR-138 and miR-145. *Mol Ther Nucleic Acids*, *11*,  
777 345-353. doi:10.1016/j.omtn.2018.03.004
- 778 **31.** Flynn, R. A., & Chang, H. Y. (2014). Long noncoding RNAs in cell-fate programming  
779 and reprogramming. *Cell Stem Cell*, *14*(6), 752-761. doi:10.1016/j.stem.2014.05.014
- 780 **32.** Goode, D. K., Obier, N., Vijayabaskar, M. S., Lie, A. L. M., Lilly, A. J., Hannah, R., . . .  
781 Bonifer, C. (2016). Dynamic Gene Regulatory Networks Drive Hematopoietic  
782 Specification and Differentiation. *Dev Cell*, *36*(5), 572-587.  
783 doi:10.1016/j.devcel.2016.01.024
- 784 **33.** Grote, P., & Herrmann, B. G. (2015). Long noncoding RNAs in organogenesis: making  
785 the difference. *Trends Genet*, *31*(6), 329-335. doi:10.1016/j.tig.2015.02.002
- 786 **34.** Guttman, M., Amit, I., Garber, M., French, C., Lin, M. F., Feldser, D., . . . Lander, E. S.  
787 (2009). Chromatin signature reveals over a thousand highly conserved large non-coding  
788 RNAs in mammals. *Nature*, *458*(7235), 223-227. doi:10.1038/nature07672
- 789 **35.** Guttman, M., Donaghey, J., Carey, B. W., Garber, M., Grenier, J. K., Munson, G., . . .  
790 Lander, E. S. (2011). lincRNAs act in the circuitry controlling pluripotency and  
791 differentiation. *Nature*, *477*(7364), 295-300. doi:10.1038/nature10398
- 792 **36.** Hacisuleyman, E., Goff, L. A., Trapnell, C., Williams, A., Henao-Mejia, J., Sun, L., . . .  
793 Rinn, J. L. (2014). Topological organization of multichromosomal regions by the long



- 794 intergenic noncoding RNA Firre. *Nat Struct Mol Biol*, 21(2), 198-206.  
795 doi:10.1038/nsmb.2764
- 796 **37.** Herriges, M. J., Swarr, D. T., Morley, M. P., Rathi, K. S., Peng, T., Stewart, K. M., &  
797 Morrisey, E. E. (2014). Long noncoding RNAs are spatially correlated with transcription  
798 factors and regulate lung development. *Genes Dev*, 28(12), 1363-1379.  
799 doi:10.1101/gad.238782.114
- 800 **38.** Jacob, M. D., Audas, T. E., Uniacke, J., Trinkle-Mulcahy, L., & Lee, S. (2013).  
801 Environmental cues induce a long noncoding RNA-dependent remodeling of the  
802 nucleolus. *Mol Biol Cell*, 24(18), 2943-2953. doi:10.1091/mbc.E13-04-0223
- 803 **39.** Jensen, L. J., Kuhn, M., Stark, M., Chaffron, S., Creevey, C., Muller, J., . . . von Mering,  
804 C. (2009). STRING 8--a global view on proteins and their functional interactions in 630  
805 organisms. *Nucleic Acids Res*, 37(Database issue), D412-416. doi:10.1093/nar/gkn760
- 806 **40.** Jin, C., Zheng, Y., Huang, Y., Liu, Y., Jia, L., & Zhou, Y. (2017). Long non-coding RNA  
807 MIAT knockdown promotes osteogenic differentiation of human adipose-derived stem  
808 cells. *Cell Biol Int*, 41(1), 33-41. doi:10.1002/cbin.10697
- 809 **41.** Kataruka, S., Akhade, V. S., Kayyar, B., & Rao, M. R. S. (2017). Mrhl Long Noncoding  
810 RNA Mediates Meiotic Commitment of Mouse Spermatogonial Cells by Regulating  
811 Sox8 Expression. *Mol Cell Biol*, 37(14). doi:10.1128/mcb.00632-16
- 812 **42.** Klattenhoff, C. A., Scheuermann, J. C., Surface, L. E., Bradley, R. K., Fields, P. A.,  
813 Steinhauser, M. L., . . . Boyer, L. A. (2013). Braveheart, a long noncoding RNA required  
814 for cardiovascular lineage commitment. *Cell*, 152(3), 570-583.  
815 doi:10.1016/j.cell.2013.01.003
- 816 **43.** Kleaveland, B., Shi, C. Y., Stefano, J., & Bartel, D. P. (2018). A Network of Noncoding  
817 Regulatory RNAs Acts in the Mammalian Brain. *Cell*, 174(2), 350-362.e317.  
818 doi:10.1016/j.cell.2018.05.022
- 819 **44.** Klein, D., Benchellal, M., Kleff, V., Jakob, H. G., & Ergun, S. (2013). Hox genes are  
820 involved in vascular wall-resident multipotent stem cell differentiation into smooth  
821 muscle cells. *Sci Rep*, 3, 2178. doi:10.1038/srep02178
- 822 **45.** Komori, T. (2002). Runx2, a multifunctional transcription factor in skeletal development.  
823 *J Cell Biochem*, 87(1), 1-8. doi:10.1002/jcb.10276
- 824 **46.** Lin, N., Chang, K. Y., Li, Z., Gates, K., Rana, Z. A., Dang, J., . . . Rana, T. M. (2014).  
825 An evolutionarily conserved long noncoding RNA TUNA controls pluripotency and  
826 neural lineage commitment. *Mol Cell*, 53(6), 1005-1019.  
827 doi:10.1016/j.molcel.2014.01.021
- 828 **47.** Lin, Y. J., Hsin, I. L., Sun, H. S., Lin, S., Lai, Y. L., Chen, H. Y., . . . Wu, H. M. (2018).  
829 NTF3 Is a Novel Target Gene of the Transcription Factor POU3F2 and Is Required for  
830 Neuronal Differentiation. *Mol Neurobiol*, 55(11), 8403-8413. doi:10.1007/s12035-018-  
831 0995-y
- 832 **48.** Loewer, S., Cabili, M. N., Guttman, M., Loh, Y. H., Thomas, K., Park, I. H., . . . Rinn, J.  
833 L. (2010). Large intergenic non-coding RNA-RoR modulates reprogramming of human  
834 induced pluripotent stem cells. *Nat Genet*, 42(12), 1113-1117. doi:10.1038/ng.710
- 835 **49.** Lu, M. H., Tang, B., Zeng, S., Hu, C. J., Xie, R., Wu, Y. Y., . . . Yang, S. M. (2016).  
836 Long noncoding RNA BC032469, a novel competing endogenous RNA, upregulates  
837 hTERT expression by sponging miR-1207-5p and promotes proliferation in gastric  
838 cancer. *Oncogene*, 35(27), 3524-3534. doi:10.1038/onc.2015.413



- 839 **50.** Marchese, F. P., Grossi, E., Marin-Bejar, O., Bharti, S. K., Raimondi, I., Gonzalez, J., . . .  
840 Huarte, M. (2016). A Long Noncoding RNA Regulates Sister Chromatid Cohesion. *Mol*  
841 *Cell*, *63*(3), 397-407. doi:10.1016/j.molcel.2016.06.031
- 842 **51.** Martin, G. R. (1981). Isolation of a pluripotent cell line from early mouse embryos  
843 cultured in medium conditioned by teratocarcinoma stem cells. *Proc Natl Acad Sci U S A*,  
844 *78*(12), 7634-7638. doi:10.1073/pnas.78.12.7634
- 845 **52.** Mathelier, A., Zhao, X., Zhang, A. W., Parcy, F., Worsley-Hunt, R., Arenillas, D. J., . . .  
846 Wasserman, W. W. (2014). JASPAR 2014: an extensively expanded and updated open-  
847 access database of transcription factor binding profiles. *Nucleic Acids Res*, *42*(Database  
848 issue), D142-147. doi:10.1093/nar/gkt997
- 849 **53.** Mercer, T. R., Dinger, M. E., & Mattick, J. S. (2009). Long non-coding RNAs: insights  
850 into functions. *Nat Rev Genet*, *10*(3), 155-159. doi:10.1038/nrg2521
- 851 **54.** Mercer, T. R., Qureshi, I. A., Gokhan, S., Dinger, M. E., Li, G., Mattick, J. S., & Mehler,  
852 M. F. (2010). Long noncoding RNAs in neuronal-glia fate specification and  
853 oligodendrocyte lineage maturation. *BMC Neurosci*, *11*, 14. doi:10.1186/1471-2202-11-  
854 14
- 855 **55.** Mondal, T., Subhash, S., Vaid, R., Enroth, S., Uday, S., Reinius, B., . . . Kanduri, C.  
856 (2015). MEG3 long noncoding RNA regulates the TGF-beta pathway genes through  
857 formation of RNA-DNA triplex structures. *Nat Commun*, *6*, 7743.  
858 doi:10.1038/ncomms8743
- 859 **56.** Nishant, K. T., Ravishankar, H., & Rao, M. R. (2004). Characterization of a mouse  
860 recombination hot spot locus encoding a novel non-protein-coding RNA. *Mol Cell Biol*,  
861 *24*(12), 5620-5634. doi:10.1128/mcb.24.12.5620-5634.2004
- 862 **57.** Niwa, H. (2018). The principles that govern transcription factor network functions in  
863 stem cells. *Development*, *145*(6). doi:10.1242/dev.157420
- 864 **58.** Ohhata, T., Hoki, Y., Sasaki, H., & Sado, T. (2008). Crucial role of antisense  
865 transcription across the Xist promoter in Tsix-mediated Xist chromatin modification.  
866 *Development*, *135*(2), 227-235. doi:10.1242/dev.008490
- 867 **59.** Pandey, R. R., Mondal, T., Mohammad, F., Enroth, S., Redrup, L., Komorowski, J., . . .  
868 Kanduri, C. (2008). Kcnq1ot1 antisense noncoding RNA mediates lineage-specific  
869 transcriptional silencing through chromatin-level regulation. *Mol Cell*, *32*(2), 232-246.  
870 doi:10.1016/j.molcel.2008.08.022
- 871 **60.** Perry, R. B., & Ulitsky, I. (2016). The functions of long noncoding RNAs in  
872 development and stem cells. *Development*, *143*(21), 3882-3894. doi:10.1242/dev.140962
- 873 **61.** Pijnappel, W., P.A. Baltissen, M., & Timmers, H. T. M. (2013). *Protocol for lentiviral*  
874 *knock down in mouse ES cells*.
- 875 **62.** Postepska-Igielska, A., Giwojna, A., Gasri-Plotnitsky, L., Schmitt, N., Dold, A.,  
876 Ginsberg, D., & Grummt, I. (2015). LncRNA Khps1 Regulates Expression of the Proto-  
877 oncogene SPHK1 via Triplex-Mediated Changes in Chromatin Structure. *Mol Cell*,  
878 *60*(4), 626-636. doi:10.1016/j.molcel.2015.10.001
- 879 **63.** Price, F. D., Yin, H., Jones, A., van Ijcken, W., Grosveld, F., & Rudnicki, M. A. (2013).  
880 Canonical Wnt signaling induces a primitive endoderm metastable state in mouse  
881 embryonic stem cells. *Stem Cells*, *31*(4), 752-764. doi:10.1002/stem.1321
- 882 **64.** Quinlan, A. R., & Hall, I. M. (2010). BEDTools: a flexible suite of utilities for comparing  
883 genomic features. *Bioinformatics*, *26*(6), 841-842. doi:10.1093/bioinformatics/btq033

- 884 **65.** Rinn, J. L., Kertesz, M., Wang, J. K., Squazzo, S. L., Xu, X., Bruggmann, S. A., . . .  
885 Chang, H. Y. (2007). Functional demarcation of active and silent chromatin domains in  
886 human HOX loci by noncoding RNAs. *Cell*, *129*(7), 1311-1323.  
887 doi:10.1016/j.cell.2007.05.022
- 888 **66.** Ripoché, M. A., Kress, C., Poirier, F., & Dandolo, L. (1997). Deletion of the H19  
889 transcription unit reveals the existence of a putative imprinting control element. *Genes*  
890 *Dev*, *11*(12), 1596-1604. doi:10.1101/gad.11.12.1596
- 891 **67.** Salguero-Aranda, C., Tapia-Limonchi, R., Cahuana, G. M., Hitos, A. B., Diaz, I.,  
892 Hmadcha, A., . . . Bedoya, F. J. (2016). Differentiation of Mouse Embryonic Stem Cells  
893 toward Functional Pancreatic beta-Cell Surrogates through Epigenetic Regulation of  
894 Pdx1 by Nitric Oxide. *Cell Transplant*, *25*(10), 1879-1892.  
895 doi:10.3727/096368916x691178
- 896 **68.** Sarangdhar, M. A., Chaubey, D., Srikakulam, N., & Pillai, B. (2018). Parentally inherited  
897 long non-coding RNA Cyran0 is involved in zebrafish neurodevelopment. *Nucleic Acids*  
898 *Res*, *46*(18), 9726-9735. doi:10.1093/nar/gky628
- 899 **69.** Sarropoulos, I., Marin, R., Cardoso-Moreira, M., & Kaessmann, H. (2019).  
900 Developmental dynamics of lncRNAs across mammalian organs and species. *Nature*.  
901 doi:10.1038/s41586-019-1341-x
- 902 **70.** Shannon, P., Markiel, A., Ozier, O., Baliga, N. S., Wang, J. T., Ramage, D., . . . Ideker,  
903 T. (2003). Cytoscape: a software environment for integrated models of biomolecular  
904 interaction networks. *Genome Res*, *13*(11), 2498-2504. doi:10.1101/gr.1239303
- 905 **71.** Sheik Mohamed, J., Gaughwin, P. M., Lim, B., Robson, P., & Lipovich, L. (2010).  
906 Conserved long noncoding RNAs transcriptionally regulated by Oct4 and Nanog  
907 modulate pluripotency in mouse embryonic stem cells. *Rna*, *16*(2), 324-337.  
908 doi:10.1261/rna.1441510
- 909 **72.** Shevtsov, S. P., & Dundr, M. (2011). Nucleation of nuclear bodies by RNA. *Nat Cell*  
910 *Biol*, *13*(2), 167-173. doi:10.1038/ncb2157
- 911 **73.** Shiba, Y., Fernandes, S., Zhu, W. Z., Filice, D., Muskheli, V., Kim, J., . . . Laflamme, M.  
912 A. (2012). Human ES-cell-derived cardiomyocytes electrically couple and suppress  
913 arrhythmias in injured hearts. *Nature*, *489*(7415), 322-325. doi:10.1038/nature11317
- 914 **74.** Shroff, G., & Gupta, R. (2015). Human embryonic stem cells in the treatment of patients  
915 with spinal cord injury. *Ann Neurosci*, *22*(4), 208-216.  
916 doi:10.5214/ans.0972.7531.220404
- 917 **75.** Sleutels, F., Zwart, R., & Barlow, D. P. (2002). The non-coding Air RNA is required for  
918 silencing autosomal imprinted genes. *Nature*, *415*(6873), 810-813. doi:10.1038/415810a
- 919 **76.** Smith, K. N., Starmer, J., Miller, S. C., Sethupathy, P., & Magnuson, T. (2017). Long  
920 Noncoding RNA Moderates MicroRNA Activity to Maintain Self-Renewal in Embryonic  
921 Stem Cells. *Stem Cell Reports*, *9*(1), 108-121. doi:10.1016/j.stemcr.2017.05.005
- 922 **77.** Sokol, S. Y. (2011). Maintaining embryonic stem cell pluripotency with Wnt signaling.  
923 *Development*, *138*(20), 4341-4350. doi:10.1242/dev.066209
- 924 **78.** Souquere, S., Beauclair, G., Harper, F., Fox, A., & Pierron, G. (2010). Highly ordered  
925 spatial organization of the structural long noncoding NEAT1 RNAs within paraspeckle  
926 nuclear bodies. *Mol Biol Cell*, *21*(22), 4020-4027. doi:10.1091/mbc.E10-08-0690
- 927 **79.** Sun, Q., Hao, Q., & Prasanth, K. V. (2018). Nuclear Long Noncoding RNAs: Key  
928 Regulators of Gene Expression. *Trends Genet*, *34*(2), 142-157.  
929 doi:10.1016/j.tig.2017.11.005

- 930 **80.** Sun, Z., Zhu, M., Lv, P., Cheng, L., Wang, Q., Tian, P., . . . Wen, B. (2018). The Long  
931 Noncoding RNA Lncenc1 Maintains Naive States of Mouse ESCs by Promoting the  
932 Glycolysis Pathway. *Stem Cell Reports*, *11*(3), 741-755.  
933 doi:10.1016/j.stemcr.2018.08.001
- 934 **81.** Thomas, P. D., Campbell, M. J., Kejariwal, A., Mi, H., Karlak, B., Daverman, R., . . .  
935 Narechania, A. (2003). PANTHER: a library of protein families and subfamilies indexed  
936 by function. *Genome Res*, *13*(9), 2129-2141. doi:10.1101/gr.772403
- 937 **82.** Trapnell, C., Roberts, A., Goff, L., Pertea, G., Kim, D., Kelley, D. R., . . . Pachter, L.  
938 (2012). Differential gene and transcript expression analysis of RNA-seq experiments with  
939 TopHat and Cufflinks. *Nat Protoc*, *7*(3), 562-578. doi:10.1038/nprot.2012.016
- 940 **83.** Tsui, D., Vessey, J. P., Tomita, H., Kaplan, D. R., & Miller, F. D. (2013). FoxP2  
941 regulates neurogenesis during embryonic cortical development. *J Neurosci*, *33*(1), 244-  
942 258. doi:10.1523/jneurosci.1665-12.2013
- 943 **84.** Tu, J., Tian, G., Cheung, H. H., Wei, W., & Lee, T. L. (2018). Gas5 is an essential  
944 lncRNA regulator for self-renewal and pluripotency of mouse embryonic stem cells and  
945 induced pluripotent stem cells. *Stem Cell Res Ther*, *9*(1), 71. doi:10.1186/s13287-018-  
946 0813-5
- 947 **85.** Ulitsky, I., Shkumatava, A., Jan, C. H., Sive, H., & Bartel, D. P. (2011). Conserved  
948 function of lincRNAs in vertebrate embryonic development despite rapid sequence  
949 evolution. *Cell*, *147*(7), 1537-1550. doi:10.1016/j.cell.2011.11.055
- 950 **86.** Urban, S., Kobi, D., Ennen, M., Langer, D., Le Gras, S., Ye, T., & Davidson, I. (2015). A  
951 Brn2-Zic1 axis specifies the neuronal fate of retinoic-acid-treated embryonic stem cells. *J*  
952 *Cell Sci*, *128*(13), 2303-2318. doi:10.1242/jcs.168849
- 953 **87.** Wang, S., Ke, H., Zhang, H., Ma, Y., Ao, L., Zou, L., . . . Jiao, B. (2018). LncRNA  
954 MIR100HG promotes cell proliferation in triple-negative breast cancer through triplex  
955 formation with p27 loci. *Cell Death Dis*, *9*(8), 805. doi:10.1038/s41419-018-0869-2
- 956 **88.** Wang, Y., Xu, Z., Jiang, J., Xu, C., Kang, J., Xiao, L., . . . Liu, H. (2013). Endogenous  
957 miRNA sponge lincRNA-RoR regulates Oct4, Nanog, and Sox2 in human embryonic  
958 stem cell self-renewal. *Dev Cell*, *25*(1), 69-80. doi:10.1016/j.devcel.2013.03.002
- 959 **89.** Warde-Farley, D., Donaldson, S. L., Comes, O., Zuberi, K., Badrawi, R., Chao, P., . . .  
960 Morris, Q. (2010). The GeneMANIA prediction server: biological network integration for  
961 gene prioritization and predicting gene function. *Nucleic Acids Res*, *38*(Web Server  
962 issue), W214-220. doi:10.1093/nar/gkq537
- 963 **90.** Yo, K., & Runger, T. M. (2018). The long non-coding RNA FLJ46906 binds to the  
964 transcription factors NF-kappaB and AP-1 and regulates expression of aging-associated  
965 genes. *Aging (Albany NY)*, *10*(8), 2037-2050. doi:10.18632/aging.101528
- 966 **91.** Zhao, J., Sun, B. K., Erwin, J. A., Song, J. J., & Lee, J. T. (2008). Polycomb proteins  
967 targeted by a short repeat RNA to the mouse X chromosome. *Science*, *322*(5902), 750-  
968 756. doi:10.1126/science.1163045
- 969 **92.** Zhou, S., Flamier, A., Abdouh, M., Tetreault, N., Barabino, A., Wadhwa, S., & Bernier,  
970 G. (2015). Differentiation of human embryonic stem cells into cone photoreceptors  
971 through simultaneous inhibition of BMP, TGFbeta and Wnt signaling. *Development*,  
972 *142*(19), 3294-3306. doi:10.1242/dev.125385
- 973
- 974

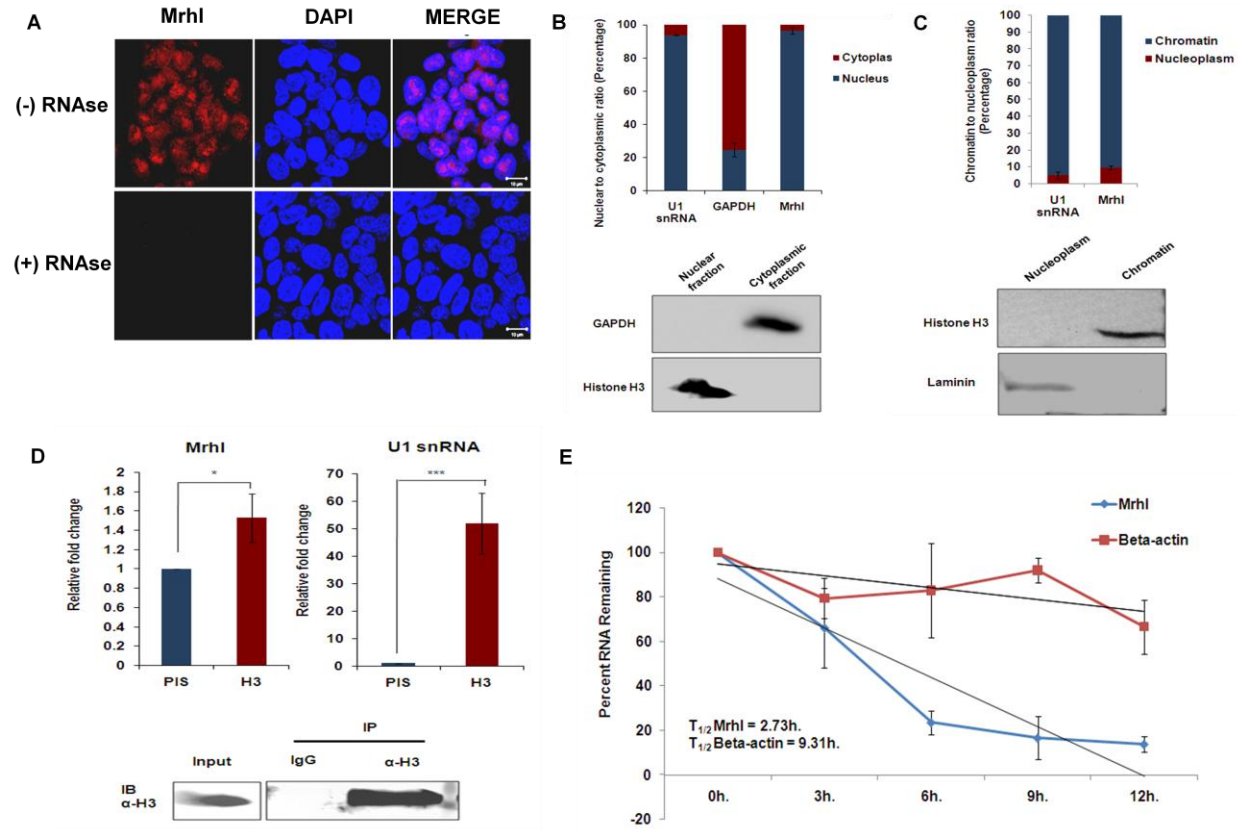

975

976

977 *Figure 1: Mrhl is a nuclear-localized, chromatin bound moderately stable lncRNA in mESCs. (A) RNA FISH shows*  
 978 *nuclear localization of Mrhl in mESCs. Scale bar = 10µm; (B) Fractionation validated observations in panel a.*  
 979 *Western blot shows purity of fractions; (C) Chromatin and nucleoplasm fractions of nuclei show localization of*  
 980 *Mrhl to chromatin. Western blot shows purity of fractions; (D) H3 ChIP and qPCR reveal Mrhl is bound with the*  
 981 *chromatin in mESCs; (E) Actinomycin D half-life assay for Mrhl in mESCs. Error bars indicate standard deviation*  
 982 *from three independent experiments. \*p<0.05, \*\*p<0.01, \*\*\*p<0.001, student's t-test; Scale bar = 10 µm.*

983



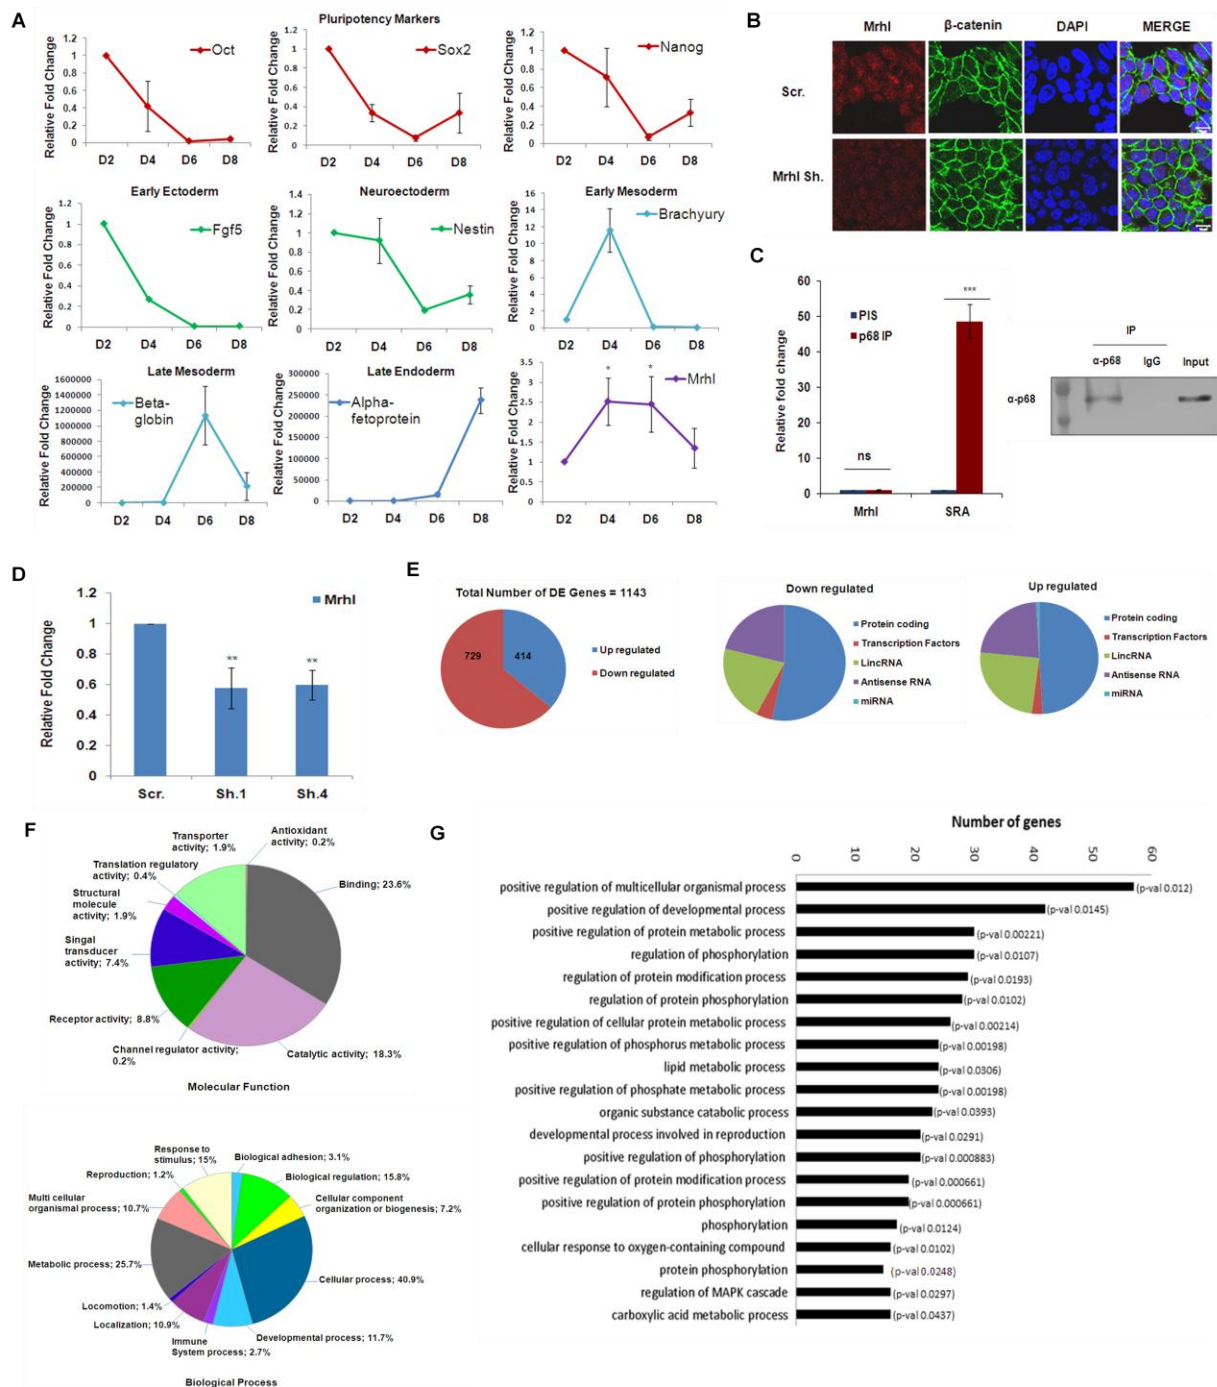

984

985

986 *Figure 2: Analysis of role of Mrhl in mESCs through differentiation assay, knockdown and transcriptome analysis.*

987 *(A) Mrhl shows differential expression during embryoid body differentiation of mESCs; (B,C) Mrhl does not*

988 *function through the WNT/p68 cascade unlike in spermatogonial progenitors; (D) Knockdown efficiency of Mrhl in*

989 *mESCs through two independent constructs i.e. sh.1 and sh.4 as compared to scrambled (scr.); (E) Representation*

990 *of DEG classification; (F) Gene ontology analysis of DEG; (G) GO enrichment analysis of DEG. Error bars*

991 *indicate standard deviation from three independent experiments. \* $p < 0.05$ , \*\* $p < 0.01$ , \*\*\* $p < 0.001$ , student's  $t$ -test;*

992 *Scale bar = 10  $\mu$ m.*

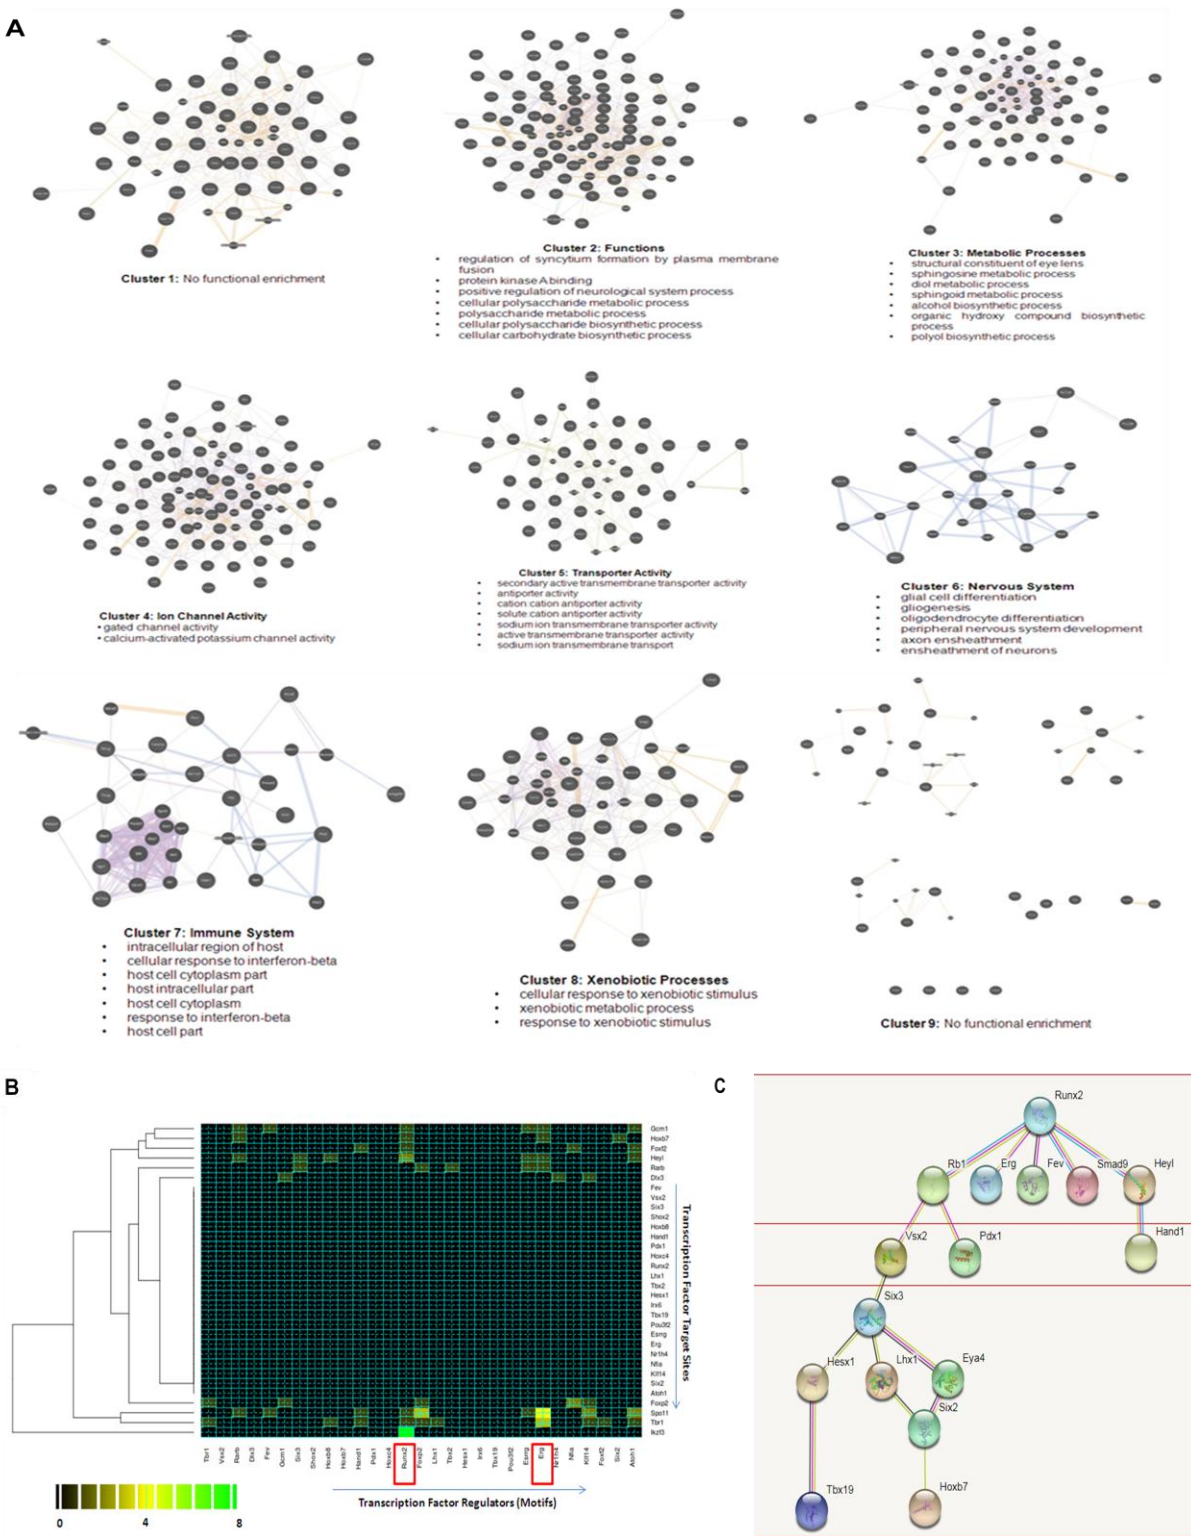

993

994

995 *Figure 3: Gene co-expression and TF network analyses. (A) Gene co-expression modules and their corresponding*

996 *functional enrichments; (B) Heat map visualization of TF matrix; (C) TF hierarchy as visualized in STRING.*



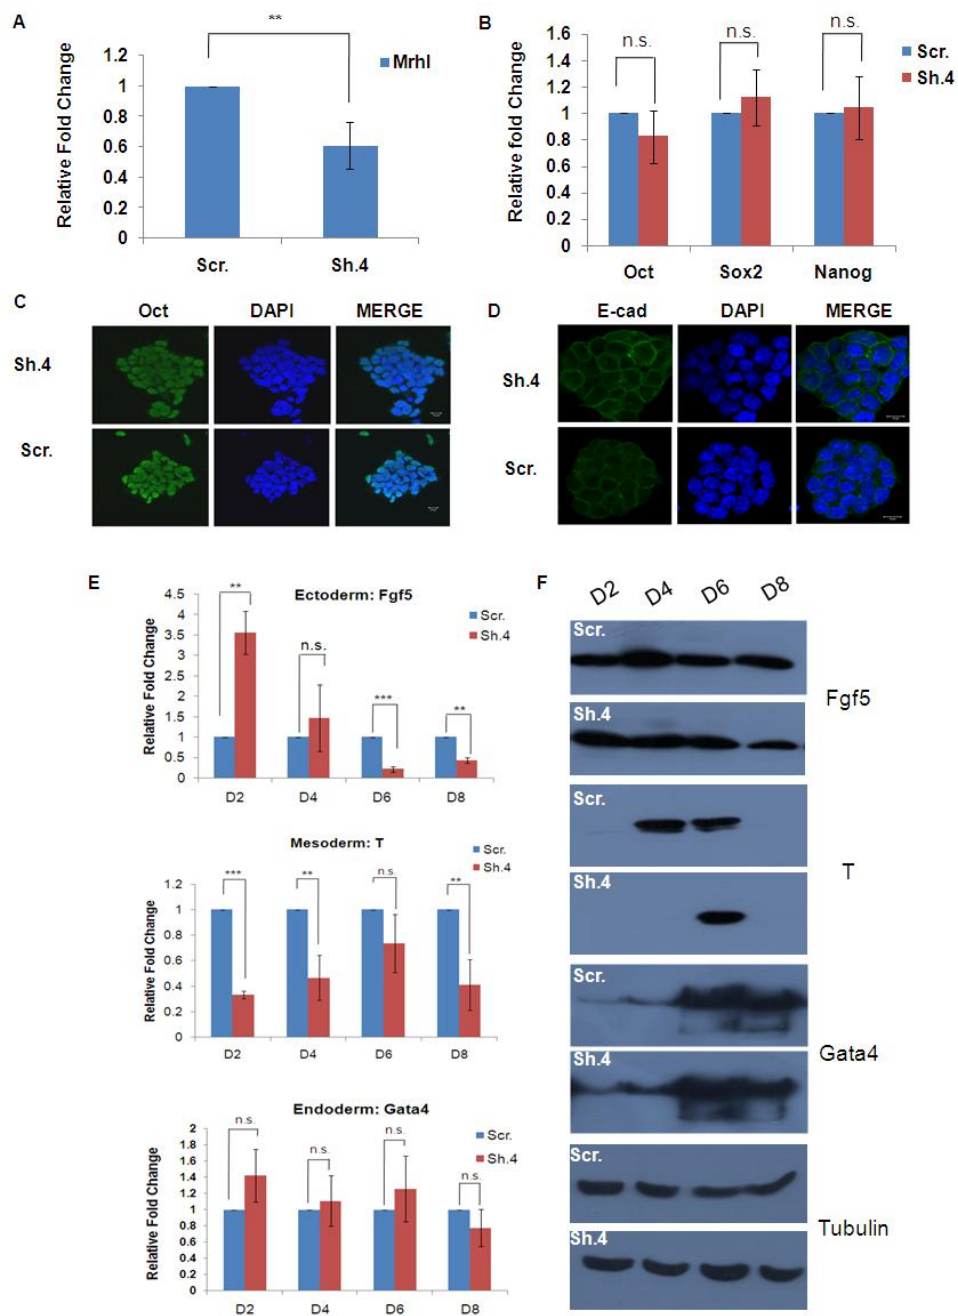

997  
 998 *Figure 4: Stable knockdown of Mrhl in mESCs causes no change in pluripotency status but aberrance in lineage*  
 999 *specification. (A) Knockdown efficiency in puromycin selected stable knockdown cells; (B) qRT-PCR for*  
 1000 *pluripotency markers; (C) Oct4 IF to confirm pluripotency status; (D) E-cadherin IF to check for cell adhesion*  
 1001 *status; (E) qRT-PCR for lineage-specific markers upon EB differentiation of stable knockdown cells as compared to*  
 1002 *scrambled control; (F) Western blots to confirm altered expression of lineage markers. Error bars indicate standard*  
 1003 *deviation from three independent experiments. \* $p < 0.05$ , \*\* $p < 0.01$ , \*\*\* $p < 0.001$ , student's  $t$ -test; Panel E is*  
 1004 *representative data from one of three independent experiments, each carried out in biological triplicates; Scale bar*  
 1005 *= 10  $\mu$ m.*

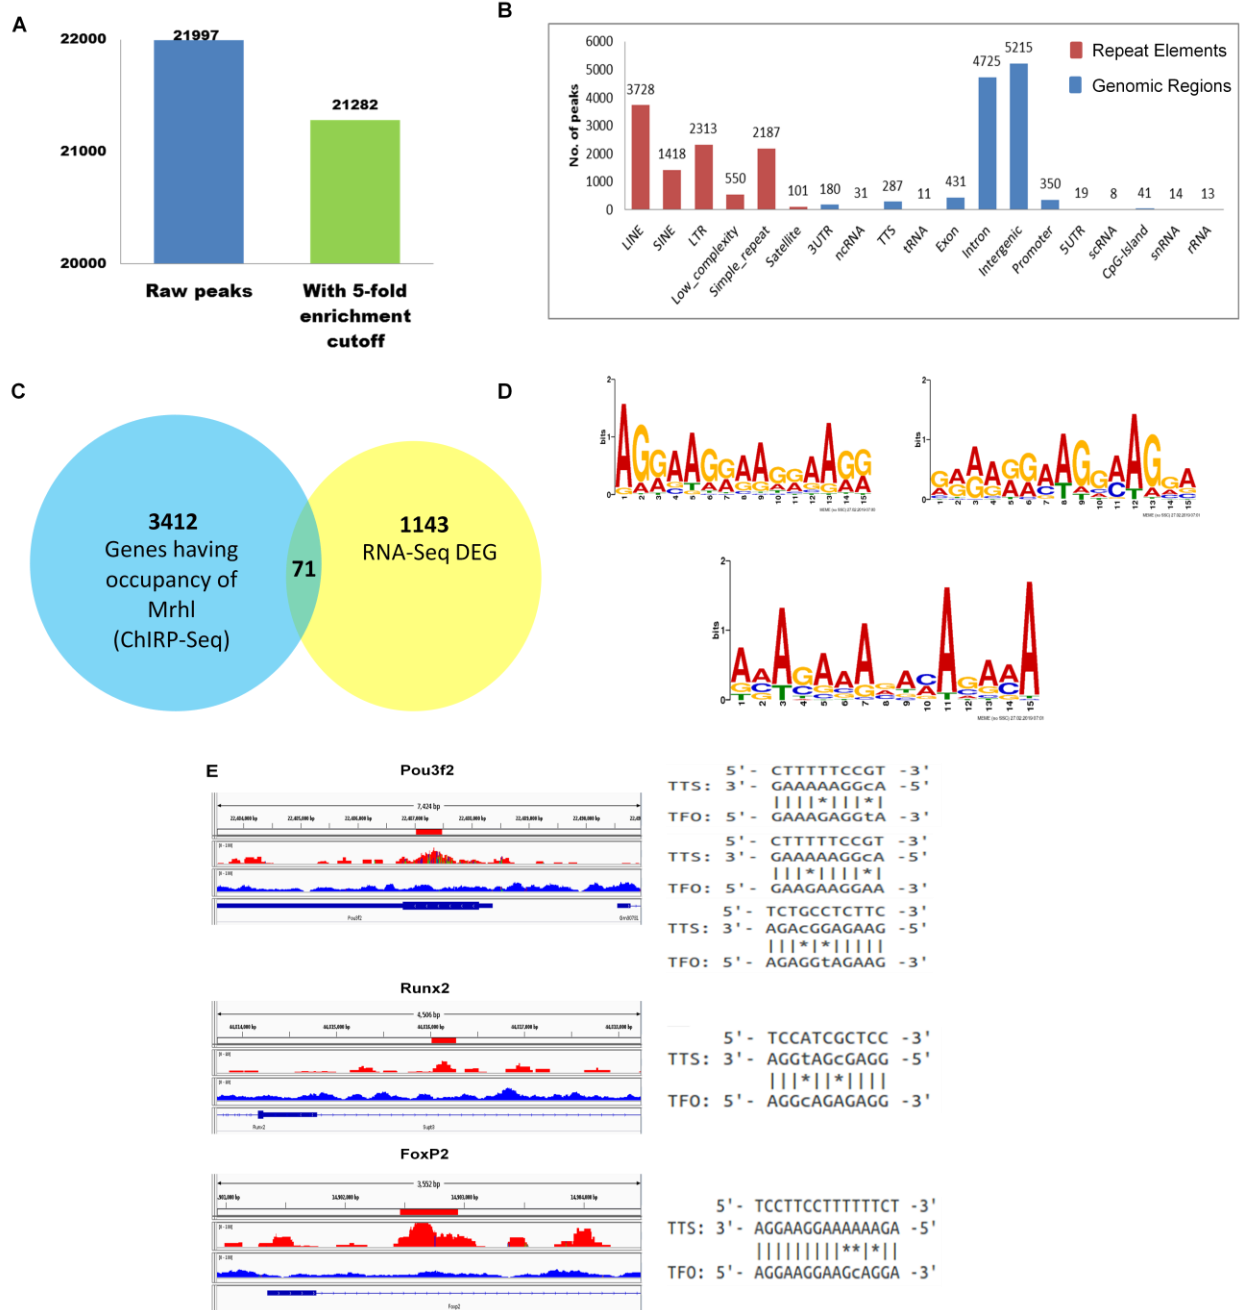

1006  
1007  
1008  
1009  
1010  
1011  
1012  
1013  
1014  
1015  
1016  
1017  
1018  
1019  
1020 *Figure 5: ChIRP-Seq analysis for Mrhl in mESCs. (A) Number of peaks obtained before and after cutoff; (B)*  
1021 *Annotation of peaks; (C) Overlap of ChIRP-Seq and RNA-Seq datasets; (D) Motif analysis for genome occupancy*  
1022 *for Mrhl on target genes; (E) Triplex formation prediction at select loci involved in development and differentiation*  
1023 *functions.*

1024  
1025
